# Supplementary material
Source: PubMed Central journal article supplement (PMC9936345)
Supplement: jamaophthalmol-e225567-s001.pdf [file jamaophthalmol-e225567-s001.pdf]

## Supplemental Online Content

Domalpally A, Whittier SA, Pan Q, et al; for the Diabetes Prevention Program Research (DPPOS) Group. Association of metformin with the development of age-related macular degeneration. *JAMA Ophthalmol*. Published online December 22, 2022. doi:10.1001/jamaophthalmol.2022.5567

**eTable 1.** Comparison of AMD severity status evaluated from color photographs and SDOCT

**eTable 2.** Distribution of number of years of metformin use by AMD severity

This supplemental material has been provided by the authors to give readers additional information about their work.

eTable 1: Comparison of AMD severity status evaluated from color photographs and SDOCT. Agreement between the two modalities was 93%. The kappa statistic was 0.79.

| Color Photography AMD | SDOCT AMD               |              |                     |                       |                    |
|-----------------------|-------------------------|--------------|---------------------|-----------------------|--------------------|
|                       | absent/<br>questionable | early<br>AMD | intermediate<br>AMD | Geographic<br>atrophy | Neovascular<br>AMD |
| Absent/ questionable  | 2390                    | 0            | 0                   | 6                     | 3                  |
| early AMD             | 133                     | 228          | 0                   | 1                     | 1                  |
| intermediate AMD      | 58                      | 0            | 244                 | 7                     | 4                  |
| Geographic atrophy    | 0                       | 0            | 0                   | 4                     | 4                  |
| Neovascular AMD       | 0                       | 0            | 0                   | 0                     | 9                  |

eTable 2: Distribution of number of years of metformin use by AMD severity. There was no difference in the number of years of metformin use between the AMD severity levels.

| Characteristics                   | P-value |                         | Absent<br>(n=1108)         | Early AMD<br>(n=229)       | Intermediate<br>AMD<br>(n=218) | Advanced<br>AMD (n=32)     | Overall<br>(n=1592)        |
|-----------------------------------|---------|-------------------------|----------------------------|----------------------------|--------------------------------|----------------------------|----------------------------|
| Years with any metformin          | 0.81    | Mean(SD)<br>Median(IQR) | 7.75(7.68)<br>5.5(0,14.50) | 7.30(7.60)<br>5.0(0,13.00) | 7.55(7.71)<br>5.5(0,14.00)     | 6.99(8.01)<br>3.5(0,12.75) | 7.67(7.68)<br>5.5(0,14.00) |
| Years with in-study metformin     | 0.97    | Mean(SD)<br>Median(IQR) | 4.38(7.47)<br>0(0, 6.38)   | 4.27(7.48)<br>0(0, 5.50)   | 4.22(7.25)<br>0(0, 6.50)       | 3.96(7.72)<br>0(0, 2.88)   | 4.35(7.45)<br>0(0, 6.25)   |
| Years with out of study metformin | 0.51    | Mean(SD)<br>Median(IQR) | 3.40(4.75)<br>0(0, 6.50)   | 3.06(4.39)<br>0(0, 6.00)   | 3.35(5.11)<br>0(0, 6.50)       | 3.11(4.32)<br>0(0.50,5.50) | 3.34(4.74)<br>0(0, 6.50)   |
