# Supplementary material
Source: PubMed Central journal article supplement (PMC9936345)
Supplement: jamaophthalmol-e225567-s002.pdf [file jamaophthalmol-e225567-s002.pdf]

\*First name, last name, and suffix (if applicable) are required and will appear in PubMed.

| <b>*Group Name(s): Diabetes Prevention Program Research (DPPOS) Group</b> |                   |                              |                         |                                       |                                                 |                                                                |                                                                                                   |
|---------------------------------------------------------------------------|-------------------|------------------------------|-------------------------|---------------------------------------|-------------------------------------------------|----------------------------------------------------------------|---------------------------------------------------------------------------------------------------|
| <b>*First Name and Middle Initial(s)</b>                                  | <b>*Last Name</b> | <b>*Suffix (eg, Jr, III)</b> | <b>Academic Degrees</b> | <b>Institution</b>                    | <b>Location (city, state/province, country)</b> | <b>Role or Contribution, eg, chair, principal investigator</b> | <b>Group (if more than 1 Group listed in the byline) and/or Subgroup (eg, Steering Committee)</b> |
| George A.                                                                 | Bray              |                              | MD                      | Pennington Biomedical Research Center | Baton Rouge, LA                                 | Principal Investigator                                         |                                                                                                   |
| Kishore M.                                                                | Gadde             |                              | MD                      | Pennington Biomedical Research Center | Baton Rouge, LA                                 | Principal Investigator                                         |                                                                                                   |
| Iris W.                                                                   | Culbert           |                              | BSN, RN, C              | Pennington Biomedical Research Center | Baton Rouge, LA                                 | Program Coordinator                                            |                                                                                                   |
| Jennifer                                                                  | Arceneaux         |                              | BSN, RN                 | Pennington Biomedical Research Center | Baton Rouge, LA                                 | Program Coordinator                                            |                                                                                                   |
| Annie                                                                     | Chatellier        |                              | RN, CCRC                | Pennington Biomedical Research Center | Baton Rouge, LA                                 | Program Coordinator                                            |                                                                                                   |
| Amber                                                                     | Dragg             |                              | LDN, RD                 | Pennington Biomedical Research Center | Baton Rouge, LA                                 | Program Coordinator                                            |                                                                                                   |
| Catherine M.                                                              | Champagne         |                              | PhD, RD                 | Pennington Biomedical Research Center | Baton Rouge, LA                                 |                                                                |                                                                                                   |
| Crystal                                                                   | Duncan            |                              | LPN                     | Pennington Biomedical Research Center | Baton Rouge, LA                                 |                                                                |                                                                                                   |
| Barbara                                                                   | Eberhardt         |                              | RD, LDN                 | Pennington Biomedical Research Center | Baton Rouge, LA                                 |                                                                |                                                                                                   |
| Frank                                                                     | Greenway          |                              | MD                      | Pennington Biomedical Research Center | Baton Rouge, LA                                 |                                                                |                                                                                                   |
| Fonda G.                                                                  | Guillory          |                              | LPN                     | Pennington Biomedical Research Center | Baton Rouge, LA                                 |                                                                |                                                                                                   |
| April A.                                                                  | Herbert           |                              | RD                      | Pennington Biomedical Research Center | Baton Rouge, LA                                 |                                                                |                                                                                                   |
| Michael L.                                                                | Jeffirs           |                              | LPN                     | Pennington Biomedical Research Center | Baton Rouge, LA                                 |                                                                |                                                                                                   |
| Betty M.                                                                  | Kennedy           |                              | MPA                     | Pennington Biomedical Research Center | Baton Rouge, LA                                 |                                                                |                                                                                                   |

## Supplemental Online Content: Nonauthor Collaborators

\*First name, last name, and suffix (if applicable) are required and will appear in PubMed.

| *First Name and Middle Initial(s) | *Last Name | *Suffix (eg, Jr, III) | Academic Degrees | Institution                           | Location (city, state/province, country) | Role or Contribution, eg, chair, principal investigator | Group (if more than 1 Group listed in the byline) and/or Subgroup (eg, Steering Committee) |
|-----------------------------------|------------|-----------------------|------------------|---------------------------------------|------------------------------------------|---------------------------------------------------------|--------------------------------------------------------------------------------------------|
| Erma                              | Levy       |                       | RD               | Pennington Biomedical Research Center | Baton Rouge, LA                          |                                                         |                                                                                            |
| Monica                            | Lockett    |                       | LPN              | Pennington Biomedical Research Center | Baton Rouge, LA                          |                                                         |                                                                                            |
| Jennifer C.                       | Lovejoy    |                       | PhD              | Pennington Biomedical Research Center | Baton Rouge, LA                          |                                                         |                                                                                            |
| Laura H.                          | Morris     |                       | BS               | Pennington Biomedical Research Center | Baton Rouge, LA                          |                                                         |                                                                                            |
| Lee E.                            | Melancon   |                       | BA, BS           | Pennington Biomedical Research Center | Baton Rouge, LA                          |                                                         |                                                                                            |
| Donna H.                          | Ryan       |                       | MD               | Pennington Biomedical Research Center | Baton Rouge, LA                          |                                                         |                                                                                            |
| Deborah A.                        | Sanford    |                       | LPN              | Pennington Biomedical Research Center | Baton Rouge, LA                          |                                                         |                                                                                            |
| Kenneth G.                        | Smith      |                       | BS, MT           | Pennington Biomedical Research Center | Baton Rouge, LA                          |                                                         |                                                                                            |
| Lisa L.                           | Smith      |                       | BS               | Pennington Biomedical Research Center | Baton Rouge, LA                          |                                                         |                                                                                            |
| Julia A.                          | St.Amant   |                       | RTR              | Pennington Biomedical Research Center | Baton Rouge, LA                          |                                                         |                                                                                            |
| Richard T.                        | Tulley     |                       | PhD              | Pennington Biomedical Research Center | Baton Rouge, LA                          |                                                         |                                                                                            |
| Paula C.                          | Vicknair   |                       | MS, RD           | Pennington Biomedical Research Center | Baton Rouge, LA                          |                                                         |                                                                                            |
| Donald                            | Williamson |                       | PhD              | Pennington Biomedical Research Center | Baton Rouge, LA                          |                                                         |                                                                                            |
| Jeffery J.                        | Zachwieja  |                       | PhD              | Pennington Biomedical Research Center | Baton Rouge, LA                          |                                                         |                                                                                            |
| Kenneth S.                        | Polonsky   |                       | MD               | University of Chicago                 | Chicago, IL                              | Principal Investigator                                  |                                                                                            |
| Janet                             | Tobian     |                       | MD, PhD          | University of Chicago                 | Chicago, IL                              | Principal Investigator                                  |                                                                                            |
| David A.                          | Ehrmann    |                       | MD               | University of Chicago                 | Chicago, IL                              | Principal Investigator                                  |                                                                                            |

## Supplemental Online Content: Nonauthor Collaborators

\*First name, last name, and suffix (if applicable) are required and will appear in PubMed.

| *First Name and Middle Initial(s) | *Last Name | *Suffix (eg, Jr, III) | Academic Degrees | Institution               | Location (city, state/province, country) | Role or Contribution, eg, chair, principal investigator | Group (if more than 1 Group listed in the byline) and/or Subgroup (eg, Steering Committee) |
|-----------------------------------|------------|-----------------------|------------------|---------------------------|------------------------------------------|---------------------------------------------------------|--------------------------------------------------------------------------------------------|
| Margaret J.                       | Matulik    |                       | RN, BSN          | University of Chicago     | Chicago, IL                              | Program Coordinator                                     |                                                                                            |
| Karla A.                          | Temple     |                       | PhD, RDN,        | University of Chicago     | Chicago, IL                              | Program Coordinator                                     |                                                                                            |
| Bart                              | Clark      |                       | MD               | University of Chicago     | Chicago, IL                              |                                                         |                                                                                            |
| Kirsten                           | Czech      |                       | MS               | University of Chicago     | Chicago, IL                              |                                                         |                                                                                            |
| Catherine                         | DeSandre   |                       | BA               | University of Chicago     | Chicago, IL                              |                                                         |                                                                                            |
| Brittanie                         | Dotson     |                       | MS               | University of Chicago     | Chicago, IL                              |                                                         |                                                                                            |
| Ruthanne                          | Hilbrich   |                       | RD               | University of Chicago     | Chicago, IL                              |                                                         |                                                                                            |
| Wylie                             | McNabb     |                       | EdD              | University of Chicago     | Chicago, IL                              |                                                         |                                                                                            |
| Ann R.                            | Semenske   |                       | MS, RD           | University of Chicago     | Chicago, IL                              |                                                         |                                                                                            |
| Jose F.                           | Caro       |                       | MD               | Jefferson Medical College | Philadelphia, PA                         | Principal Investigator                                  |                                                                                            |
| Kevin                             | Furlong    |                       | DO               | Jefferson Medical College | Philadelphia, PA                         | Principal Investigator                                  |                                                                                            |
| Barry J.                          | Goldstein  |                       | MD, PhD          | Jefferson Medical College | Philadelphia, PA                         | Principal Investigator                                  |                                                                                            |
| Pamela G.                         | Watson     |                       | RN, ScD          | Jefferson Medical College | Philadelphia, PA                         | Principal Investigator                                  |                                                                                            |
| Kellie A.                         | Smith      |                       | RN, MSN          | Jefferson Medical College | Philadelphia, PA                         | Program Coordinator                                     |                                                                                            |
| Jewel                             | Mendoza    |                       | RN, BSN          | Jefferson Medical College | Philadelphia, PA                         | Program Coordinator                                     |                                                                                            |
| Marsha                            | Simmons    |                       | CCRP             | Jefferson Medical College | Philadelphia, PA                         | Program Coordinator                                     |                                                                                            |
| Wendi                             | Wildman    |                       | RN               | Jefferson Medical College | Philadelphia, PA                         | Program Coordinator                                     |                                                                                            |
| Renee                             | Liberoni   |                       | MPH              | Jefferson Medical College | Philadelphia, PA                         |                                                         |                                                                                            |
| John                              | Spandorfer |                       | MD               | Jefferson Medical College | Philadelphia, PA                         |                                                         |                                                                                            |
| Constance                         | Pepe       |                       | MS, RD           | Jefferson Medical College | Philadelphia, PA                         |                                                         |                                                                                            |
| Richard P.                        | Donahue    |                       | PhD              | University of Miami       | Miami, FL                                | Principal Investigator                                  |                                                                                            |
| Ronald B.                         | Goldberg   |                       | MD               | University of Miami       | Miami, FL                                | Principal Investigator                                  |                                                                                            |
| Ronald                            | Prineas    |                       | MD, PhD          | University of Miami       | Miami, FL                                | Principal Investigator                                  |                                                                                            |
| Jeanette                          | Calles     |                       | MSEd             | University of Miami       | Miami, FL                                | Program Coordinator                                     |                                                                                            |

## Supplemental Online Content: Nonauthor Collaborators

\*First name, last name, and suffix (if applicable) are required and will appear in PubMed.

| *First Name and Middle Initial(s) | *Last Name       | *Suffix (eg, Jr, III) | Academic Degrees | Institution                                   | Location (city, state/province, country) | Role or Contribution, eg, chair, principal investigator | Group (if more than 1 Group listed in the byline) and/or Subgroup (eg, Steering Committee) |
|-----------------------------------|------------------|-----------------------|------------------|-----------------------------------------------|------------------------------------------|---------------------------------------------------------|--------------------------------------------------------------------------------------------|
| Anna                              | Giannella        |                       | RD, MS           | University of Miami                           | Miami, FL                                | Program Coordinator                                     |                                                                                            |
| Patricia                          | Rowe             |                       | MPA              | University of Miami                           | Miami, FL                                | Program Coordinator                                     |                                                                                            |
| Juliet                            | Sanguily         |                       | RN               | University of Miami                           | Miami, FL                                | Program Coordinator                                     |                                                                                            |
| Paul                              | Cassanova-Romero |                       | MD               | University of Miami                           | Miami, FL                                |                                                         |                                                                                            |
| Sumaya                            | Castillo-Florez  |                       | MPH              | University of Miami                           | Miami, FL                                |                                                         |                                                                                            |
| Hermes J.                         | Florez           |                       | MD               | University of Miami                           | Miami, FL                                |                                                         |                                                                                            |
| Rajesh                            | Garg             |                       | MD               | University of Miami                           | Miami, FL                                |                                                         |                                                                                            |
| Lascelles                         | Kirby            |                       | MS               | University of Miami                           | Miami, FL                                |                                                         |                                                                                            |
| Olga                              | Lara             |                       |                  | University of Miami                           | Miami, FL                                |                                                         |                                                                                            |
| Carmen                            | Larreal          |                       |                  | University of Miami                           | Miami, FL                                |                                                         |                                                                                            |
| Valerie                           | McLymont         |                       | RN               | University of Miami                           | Miami, FL                                |                                                         |                                                                                            |
| Jadell                            | Mendez           |                       |                  | University of Miami                           | Miami, FL                                |                                                         |                                                                                            |
| Arlette                           | Perry            |                       | PhD              | University of Miami                           | Miami, FL                                |                                                         |                                                                                            |
| Patrice                           | Saab             |                       | PhD              | University of Miami                           | Miami, FL                                |                                                         |                                                                                            |
| Bertha                            | Veciana          |                       |                  | University of Miami                           | Miami, FL                                |                                                         |                                                                                            |
| Steven M.                         | Haffner          |                       | MD, MPH          | The University of Texas Health Science Center | San Antonio, TX                          | Principal Investigator                                  |                                                                                            |
| Helen P.                          | Hazuda           |                       | PhD              | The University of Texas Health Science Center | San Antonio, TX                          | Principal Investigator                                  |                                                                                            |
| Maria G.                          | Montez           |                       | RN, MSHP,        | The University of Texas Health Science Center | San Antonio, TX                          | Program Coordinator                                     |                                                                                            |
| Kathy                             | Hattaway         |                       | RD, MS           | The University of Texas Health Science Center | San Antonio, TX                          |                                                         |                                                                                            |
| Juan                              | Isaac            |                       | RN, BSN          | The University of Texas Health Science Center | San Antonio, TX                          |                                                         |                                                                                            |
| Carlos                            | Lorenzo          |                       | MD, PhD          | The University of Texas Health Science Center | San Antonio, TX                          |                                                         |                                                                                            |

## Supplemental Online Content: Nonauthor Collaborators

\*First name, last name, and suffix (if applicable) are required and will appear in PubMed.

| *First Name and Middle Initial(s) | *Last Name | *Suffix (eg, Jr, III) | Academic Degrees | Institution                                   | Location (city, state/province, country) | Role or Contribution, eg, chair, principal investigator | Group (if more than 1 Group listed in the byline) and/or Subgroup (eg, Steering Committee) |
|-----------------------------------|------------|-----------------------|------------------|-----------------------------------------------|------------------------------------------|---------------------------------------------------------|--------------------------------------------------------------------------------------------|
| Arlene                            | Martinez   |                       | RN, BSN, C       | The University of Texas Health Science Center | San Antonio, TX                          |                                                         |                                                                                            |
| Monica                            | Salazar    |                       |                  | The University of Texas Health Science Center | San Antonio, TX                          |                                                         |                                                                                            |
| Tatiana                           | Walker     |                       | RD, MS, CD       | The University of Texas Health Science Center | San Antonio, TX                          |                                                         |                                                                                            |
| Richard F.                        | Hamman     |                       | MD, DrPH         | University of Colorado                        | Denver, CO                               | Principal Investigator                                  |                                                                                            |
| Patricia V.                       | Nash       |                       | MS               | University of Colorado                        | Denver, CO                               | Program Coordinator                                     |                                                                                            |
| Sheila C.                         | Steinke    |                       | MS               | University of Colorado                        | Denver, CO                               | Program Coordinator                                     |                                                                                            |
| Lisa                              | Testaverde |                       | MS               | University of Colorado                        | Denver, CO                               | Program Coordinator                                     |                                                                                            |
| Jennifer                          | Truong     |                       | MPH              | University of Colorado                        | Denver, CO                               | Program Coordinator                                     |                                                                                            |
| Denise R.                         | Anderson   |                       | RN, BSN          | University of Colorado                        | Denver, CO                               |                                                         |                                                                                            |
| Larry B.                          | Ballonoff  |                       | MD               | University of Colorado                        | Denver, CO                               |                                                         |                                                                                            |
| Alexis                            | Bouffard   |                       | MA, RN, BS       | University of Colorado                        | Denver, CO                               |                                                         |                                                                                            |
| Brian                             | Bucca      |                       | FAOO, OD         | University of Colorado                        | Denver, CO                               |                                                         |                                                                                            |
| B. Ned                            | Calonge    |                       | MD, MPH          | University of Colorado                        | Denver, CO                               |                                                         |                                                                                            |
| Lynne                             | Delve      |                       |                  | University of Colorado                        | Denver, CO                               |                                                         |                                                                                            |
| Martha                            | Farago     |                       | RN               | University of Colorado                        | Denver, CO                               |                                                         |                                                                                            |
| James O.                          | Hill       |                       | PhD              | University of Colorado                        | Denver, CO                               |                                                         |                                                                                            |
| Shelley R.                        | Hoyer      |                       | BS               | University of Colorado                        | Denver, CO                               |                                                         |                                                                                            |
| Tonya                             | Jenkins    |                       | RD, CDE          | University of Colorado                        | Denver, CO                               |                                                         |                                                                                            |
| Bonnie T.                         | Jortberg   |                       | MS, RD, CD       | University of Colorado                        | Denver, CO                               |                                                         |                                                                                            |
| Dione                             | Lenz       |                       | RN, BSN, C       | University of Colorado                        | Denver, CO                               |                                                         |                                                                                            |
| Marsha                            | Miller     |                       | MS, RD           | University of Colorado                        | Denver, CO                               |                                                         |                                                                                            |
| Thomas                            | Nilan      |                       | BS               | University of Colorado                        | Denver, CO                               |                                                         |                                                                                            |
| Leigh                             | Perreault  |                       | MD               | University of Colorado                        | Denver, CO                               |                                                         |                                                                                            |
| David W.                          | Price      |                       | MD               | University of Colorado                        | Denver, CO                               |                                                         |                                                                                            |

## Supplemental Online Content: Nonauthor Collaborators

\*First name, last name, and suffix (if applicable) are required and will appear in PubMed.

| *First Name and Middle Initial(s) | *Last Name   | *Suffix (eg, Jr, III) | Academic Degrees | Institution            | Location (city, state/province, country) | Role or Contribution, eg, chair, principal investigator | Group (if more than 1 Group listed in the byline) and/or Subgroup (eg, Steering Committee) |
|-----------------------------------|--------------|-----------------------|------------------|------------------------|------------------------------------------|---------------------------------------------------------|--------------------------------------------------------------------------------------------|
| Judith G.                         | Regensteiner |                       | PhD              | University of Colorado | Denver, CO                               |                                                         |                                                                                            |
| Emily B.                          | Schroeder    |                       | MD               | University of Colorado | Denver, CO                               |                                                         |                                                                                            |
| Helen                             | Seagle       |                       | MS, RD           | University of Colorado | Denver, CO                               |                                                         |                                                                                            |
| Carissa M.                        | Smith        |                       | BS               | University of Colorado | Denver, CO                               |                                                         |                                                                                            |
| Brent                             | VanDorsten   |                       | PhD              | University of Colorado | Denver, CO                               |                                                         |                                                                                            |
| Edward S.                         | Horton       |                       | MD               | Joslin Diabetes Center | Boston, MA                               | Principal Investigator                                  |                                                                                            |
| Medha                             | Munshi       |                       | MD               | Joslin Diabetes Center | Boston, MA                               | Principal Investigator                                  |                                                                                            |
| Kathleen E.                       | Lawton       |                       | RN               | Joslin Diabetes Center | Boston, MA                               | Program Coordinator                                     |                                                                                            |
| Sharon D.                         | Jackson      |                       | CCRC, MS,        | Joslin Diabetes Center | Boston, MA                               | Program Coordinator                                     |                                                                                            |
| Catherine S.                      | Poirier      |                       | RN, BSN          | Joslin Diabetes Center | Boston, MA                               | Program Coordinator                                     |                                                                                            |
| Kati                              | Swift        |                       | RN, BSN          | Joslin Diabetes Center | Boston, MA                               | Program Coordinator                                     |                                                                                            |
| Ronald A.                         | Arky         |                       | MD               | Joslin Diabetes Center | Boston, MA                               |                                                         |                                                                                            |
| Marybeth                          | Bryant       |                       |                  | Joslin Diabetes Center | Boston, MA                               |                                                         |                                                                                            |
| Jacqueline P.                     | Burke        |                       | BSN              | Joslin Diabetes Center | Boston, MA                               |                                                         |                                                                                            |
| Enrique                           | Caballero    |                       | MD               | Joslin Diabetes Center | Boston, MA                               |                                                         |                                                                                            |
| Karen M.                          | Callaphan    |                       | BA               | Joslin Diabetes Center | Boston, MA                               |                                                         |                                                                                            |
| Barbara                           | Fagnoli      |                       | RD               | Joslin Diabetes Center | Boston, MA                               |                                                         |                                                                                            |
| Therese                           | Franklin     |                       |                  | Joslin Diabetes Center | Boston, MA                               |                                                         |                                                                                            |
| Om P.                             | Ganda        |                       | MD               | Joslin Diabetes Center | Boston, MA                               |                                                         |                                                                                            |
| Ashley                            | Guidi        |                       | BS               | Joslin Diabetes Center | Boston, MA                               |                                                         |                                                                                            |
| Mathew                            | Guido        |                       | BA               | Joslin Diabetes Center | Boston, MA                               |                                                         |                                                                                            |
| Alan M.                           | Jacobsen     |                       | MD               | Joslin Diabetes Center | Boston, MA                               |                                                         |                                                                                            |
| Lyn M.                            | Kula         |                       | RD               | Joslin Diabetes Center | Boston, MA                               |                                                         |                                                                                            |
| Margaret                          | Kocal        |                       | RN, CDE          | Joslin Diabetes Center | Boston, MA                               |                                                         |                                                                                            |
| Lori                              | Lambert      |                       | MS, RD, LD       | Joslin Diabetes Center | Boston, MA                               |                                                         |                                                                                            |
| Kathleen E.                       | Lawton       |                       | RN               | Joslin Diabetes Center | Boston, MA                               |                                                         |                                                                                            |
| Sarah                             | Ledbury      |                       | Med, RD          | Joslin Diabetes Center | Boston, MA                               |                                                         |                                                                                            |

Supplemental Online Content: Nonauthor Collaborators

\*First name, last name, and suffix (if applicable) are required and will appear in PubMed.

| *First Name and Middle Initial(s) | *Last Name  | *Suffix (eg, Jr, III) | Academic Degrees | Institution                                                    | Location (city, state/province, country) | Role or Contribution, eg, chair, principal investigator | Group (if more than 1 Group listed in the byline) and/or Subgroup (eg, Steering Committee) |
|-----------------------------------|-------------|-----------------------|------------------|----------------------------------------------------------------|------------------------------------------|---------------------------------------------------------|--------------------------------------------------------------------------------------------|
| Maureen A.                        | Malloy      |                       | BS               | Joslin Diabetes Center                                         | Boston, MA                               |                                                         |                                                                                            |
| Roeland J.W.                      | Middelbeek  |                       | MD               | Joslin Diabetes Center                                         | Boston, MA                               |                                                         |                                                                                            |
| Maryanne                          | Nicosia     |                       | MS, RD           | Joslin Diabetes Center                                         | Boston, MA                               |                                                         |                                                                                            |
| Cathryn F.                        | Oldmixon    |                       | RN               | Joslin Diabetes Center                                         | Boston, MA                               |                                                         |                                                                                            |
| Jocelyn                           | Pan         |                       | BS, MPH          | Joslin Diabetes Center                                         | Boston, MA                               |                                                         |                                                                                            |
| Marizel                           | Quitingon   |                       |                  | Joslin Diabetes Center                                         | Boston, MA                               |                                                         |                                                                                            |
| Riley                             | Rainville   |                       | BS               | Joslin Diabetes Center                                         | Boston, MA                               |                                                         |                                                                                            |
| Stacy                             | Rubtchinsky |                       | BS               | Joslin Diabetes Center                                         | Boston, MA                               |                                                         |                                                                                            |
| Ellen W.                          | Seely       |                       | MD               | Joslin Diabetes Center                                         | Boston, MA                               |                                                         |                                                                                            |
| Jessica                           | Sansoucy    |                       | BS               | Joslin Diabetes Center                                         | Boston, MA                               |                                                         |                                                                                            |
| Dana                              | Schweizer   |                       | BSN              | Joslin Diabetes Center                                         | Boston, MA                               |                                                         |                                                                                            |
| Donald                            | Simonson    |                       | MD               | Joslin Diabetes Center                                         | Boston, MA                               |                                                         |                                                                                            |
| Fannie                            | Smith       |                       | MD               | Joslin Diabetes Center                                         | Boston, MA                               |                                                         |                                                                                            |
| Caren G.                          | Solomon     |                       | MD, MPH          | Joslin Diabetes Center                                         | Boston, MA                               |                                                         |                                                                                            |
| Jeanne                            | Spellman    |                       | RD               | Joslin Diabetes Center                                         | Boston, MA                               |                                                         |                                                                                            |
| James                             | Warram      |                       | MD               | Joslin Diabetes Center                                         | Boston, MA                               |                                                         |                                                                                            |
|                                   |             |                       |                  |                                                                |                                          |                                                         |                                                                                            |
| Steven E.                         | Kahn        |                       | MB, ChB          | VA Puget Sound Health Care System and University of Washington | Seattle, WA                              | Principal Investigator                                  |                                                                                            |
| Basma                             | Fattaleh    |                       | BA               | VA Puget Sound Health Care System and University of Washington | Seattle, WA                              | Program Coordinator                                     |                                                                                            |
| Brenda K.                         | Montgomery  |                       | RN, BSN, C       | VA Puget Sound Health Care System and University of Washington | Seattle, WA                              | Program Coordinator                                     |                                                                                            |
| Celeste                           | Colegrove   |                       | BS               | VA Puget Sound Health Care System and University of Washington | Seattle, WA                              |                                                         |                                                                                            |

Supplemental Online Content: Nonauthor Collaborators

\*First name, last name, and suffix (if applicable) are required and will appear in PubMed.

| *First Name and Middle Initial(s) | *Last Name     | *Suffix (eg, Jr, III) | Academic Degrees | Institution                                                    | Location (city, state/province, country) | Role or Contribution, eg, chair, principal investigator | Group (if more than 1 Group listed in the byline) and/or Subgroup (eg, Steering Committee) |
|-----------------------------------|----------------|-----------------------|------------------|----------------------------------------------------------------|------------------------------------------|---------------------------------------------------------|--------------------------------------------------------------------------------------------|
| Wilfred                           | Fujimoto       |                       | MD               | VA Puget Sound Health Care System and University of Washington | Seattle, WA                              |                                                         |                                                                                            |
| Robert H.                         | Knopp          |                       | MD               | VA Puget Sound Health Care System and University of Washington | Seattle, WA                              |                                                         |                                                                                            |
| Edward W.                         | Lipkin         |                       | MD               | VA Puget Sound Health Care System and University of Washington | Seattle, WA                              |                                                         |                                                                                            |
| Michelle                          | Marr           |                       | BA               | VA Puget Sound Health Care System and University of Washington | Seattle, WA                              |                                                         |                                                                                            |
| Ivy                               | Morgan-Taggart |                       |                  | VA Puget Sound Health Care System and University of Washington | Seattle, WA                              |                                                         |                                                                                            |
| Anne                              | Murillo        |                       | BS               | VA Puget Sound Health Care System and University of Washington | Seattle, WA                              |                                                         |                                                                                            |
| Kayla                             | O'Neal         |                       | BS               | VA Puget Sound Health Care System and University of Washington | Seattle, WA                              |                                                         |                                                                                            |
| Dace                              | Trence         |                       | MD               | VA Puget Sound Health Care System and University of Washington | Seattle, WA                              |                                                         |                                                                                            |
| Lonnese                           | Taylor         |                       | RN, BS           | VA Puget Sound Health Care System and University of Washington | Seattle, WA                              |                                                         |                                                                                            |
| April                             | Thomas         |                       | RD, MPH, C       | VA Puget Sound Health Care System and University of Washington | Seattle, WA                              |                                                         |                                                                                            |



Supplemental Online Content: Nonauthor Collaborators

\*First name, last name, and suffix (if applicable) are required and will appear in PubMed.

| *First Name and Middle Initial(s) | *Last Name       | *Suffix (eg, Jr, III) | Academic Degrees | Institution                                                    | Location (city, state/province, country) | Role or Contribution, eg, chair, principal investigator | Group (if more than 1 Group listed in the byline) and/or Subgroup (eg, Steering Committee) |
|-----------------------------------|------------------|-----------------------|------------------|----------------------------------------------------------------|------------------------------------------|---------------------------------------------------------|--------------------------------------------------------------------------------------------|
| Elaine C.                         | Tsai             |                       | MD, MPH          | VA Puget Sound Health Care System and University of Washington | Seattle, WA                              |                                                         |                                                                                            |
| Samuel                            | Dagogo-Jack      |                       | MD, MSc, F       | University of Tennessee                                        | Memphis, TN                              | Principal Investigator                                  |                                                                                            |
| Abbas E.                          | Kitabchi         |                       | PhD, MD, F       | University of Tennessee                                        | Memphis, TN                              | Principal Investigator                                  |                                                                                            |
| Mary E.                           | Murphy           |                       | RN, MS, CD       | University of Tennessee                                        | Memphis, TN                              | Program Coordinator                                     |                                                                                            |
| Laura                             | Taylor           |                       | RN, BSN, C       | University of Tennessee                                        | Memphis, TN                              | Program Coordinator                                     |                                                                                            |
| Jennifer                          | Dolgoff          |                       | RN, BSN          | University of Tennessee                                        | Memphis, TN                              | Program Coordinator                                     |                                                                                            |
| William B.                        | Applegate        |                       | MD, MPH          | University of Tennessee                                        | Memphis, TN                              |                                                         |                                                                                            |
| Michael                           | Bryer-Ash        |                       | MD               | University of Tennessee                                        | Memphis, TN                              |                                                         |                                                                                            |
| Debra                             | Clark            |                       | LPN              | University of Tennessee                                        | Memphis, TN                              |                                                         |                                                                                            |
| Sandra L.                         | Frieson          |                       | RN               | University of Tennessee                                        | Memphis, TN                              |                                                         |                                                                                            |
| Uzoma                             | Ibebuogu         |                       | MD               | University of Tennessee                                        | Memphis, TN                              |                                                         |                                                                                            |
| Raed                              | Imseis           |                       | MD               | University of Tennessee                                        | Memphis, TN                              |                                                         |                                                                                            |
| Helen                             | Lambeth          |                       | RN, BSN          | University of Tennessee                                        | Memphis, TN                              |                                                         |                                                                                            |
| Lynne C.                          | Lichtermann      |                       | RN, BSN          | University of Tennessee                                        | Memphis, TN                              |                                                         |                                                                                            |
| Hooman                            | Oktaei           |                       | MD               | University of Tennessee                                        | Memphis, TN                              |                                                         |                                                                                            |
| Harriet                           | Ricks            |                       |                  | University of Tennessee                                        | Memphis, TN                              |                                                         |                                                                                            |
| Lily M.K.                         | Rutledge         |                       | RN, BSN          | University of Tennessee                                        | Memphis, TN                              |                                                         |                                                                                            |
| Amy R.                            | Sherman          |                       | RD, LD           | University of Tennessee                                        | Memphis, TN                              |                                                         |                                                                                            |
| Clara M.                          | Smith            |                       | RD, MHP, L       | University of Tennessee                                        | Memphis, TN                              |                                                         |                                                                                            |
| Judith E.                         | Soberman         |                       | MD               | University of Tennessee                                        | Memphis, TN                              |                                                         |                                                                                            |
| Beverly                           | Williams-Cleaves |                       | MD               | University of Tennessee                                        | Memphis, TN                              |                                                         |                                                                                            |
| Avnisha                           | Patel            |                       | MLT              | University of Tennessee                                        | Memphis, TN                              |                                                         |                                                                                            |
| Ebenezer A.                       | Nyenwe           |                       | MD, FACP         | University of Tennessee                                        | Memphis, TN                              |                                                         |                                                                                            |
| Ethel Faye                        | Hampton          |                       | RN               | University of Tennessee                                        | Memphis, TN                              |                                                         |                                                                                            |
|                                   |                  |                       |                  |                                                                |                                          |                                                         |                                                                                            |

## Supplemental Online Content: Nonauthor Collaborators

\*First name, last name, and suffix (if applicable) are required and will appear in PubMed.

| *First Name and Middle Initial(s) | *Last Name | *Suffix (eg, Jr, III) | Academic Degrees | Institution                    | Location (city, state/province, country) | Role or Contribution, eg, chair, principal investigator | Group (if more than 1 Group listed in the byline) and/or Subgroup (eg, Steering Committee) |
|-----------------------------------|------------|-----------------------|------------------|--------------------------------|------------------------------------------|---------------------------------------------------------|--------------------------------------------------------------------------------------------|
| Boyd E.                           | Metzger    |                       | MD               | Northwestern University        | Chicago, IL                              | Principal Investigator                                  |                                                                                            |
| Mark E.                           | Molitch    |                       | MD               | Northwestern University        | Chicago, IL                              | Principal Investigator                                  |                                                                                            |
| Mariana K.                        | Johnson    |                       | MS, RN           | Northwestern University        | Chicago, IL                              | Program Coordinator                                     |                                                                                            |
| Daphne T.                         | Adelman    |                       | MBA, RN          | Northwestern University        | Chicago, IL                              |                                                         |                                                                                            |
| Catherine                         | Behrends   |                       |                  | Northwestern University        | Chicago, IL                              |                                                         |                                                                                            |
| Michelle                          | Cook       |                       | MS               | Northwestern University        | Chicago, IL                              |                                                         |                                                                                            |
| Marian                            | Fitzgibbon |                       | PhD              | Northwestern University        | Chicago, IL                              |                                                         |                                                                                            |
| Mimi M.                           | Giles      |                       | MS, RD           | Northwestern University        | Chicago, IL                              |                                                         |                                                                                            |
| Deloris                           | Heard      |                       | MA               | Northwestern University        | Chicago, IL                              |                                                         |                                                                                            |
| Cheryl K.H.                       | Johnson    |                       | MS, RN           | Northwestern University        | Chicago, IL                              |                                                         |                                                                                            |
| Diane                             | Larsen     |                       | BS               | Northwestern University        | Chicago, IL                              |                                                         |                                                                                            |
| Anne                              | Lowe       |                       | BS               | Northwestern University        | Chicago, IL                              |                                                         |                                                                                            |
| Megan                             | Lyman      |                       | BS               | Northwestern University        | Chicago, IL                              |                                                         |                                                                                            |
| David                             | McPherson  |                       | MD               | Northwestern University        | Chicago, IL                              |                                                         |                                                                                            |
| Samsam C.                         | Penn       |                       | BA               | Northwestern University        | Chicago, IL                              |                                                         |                                                                                            |
| Thomas                            | Pitts      |                       | MD               | Northwestern University        | Chicago, IL                              |                                                         |                                                                                            |
| Renee                             | Reinhart   |                       | RN, MS           | Northwestern University        | Chicago, IL                              |                                                         |                                                                                            |
| Susan                             | Roston     |                       | RN, RD           | Northwestern University        | Chicago, IL                              |                                                         |                                                                                            |
| Pamela A.                         | Schinleber |                       | RN, MS           | Northwestern University        | Chicago, IL                              |                                                         |                                                                                            |
| Amisha                            | Wallia     |                       | MD               | Northwestern University        | Chicago, IL                              |                                                         |                                                                                            |
| David M.                          | Nathan     |                       | MD               | Massachusetts General Hospital | Boston, MA                               | Principal Investigator                                  |                                                                                            |
| Charles                           | McKittrick |                       | BSN              | Massachusetts General Hospital | Boston, MA                               | Program Coordinator                                     |                                                                                            |
| Heather                           | Turgeon    |                       | BSN              | Massachusetts General Hospital | Boston, MA                               | Program Coordinator                                     |                                                                                            |
| Mary                              | Larkin     |                       | MS               | Massachusetts General Hospital | Boston, MA                               | Program Coordinator                                     |                                                                                            |
| Marielle                          | Mugford    |                       | BA               | Massachusetts General Hospital | Boston, MA                               | Program Coordinator                                     |                                                                                            |
| Kathy                             | Abbott     |                       |                  | Massachusetts General Hospital | Boston, MA                               |                                                         |                                                                                            |

## Supplemental Online Content: Nonauthor Collaborators

\*First name, last name, and suffix (if applicable) are required and will appear in PubMed.

| *First Name and Middle Initial(s) | *Last Name       | *Suffix (eg, Jr, III) | Academic Degrees | Institution                        | Location (city, state/province, country) | Role or Contribution, eg, chair, principal investigator | Group (if more than 1 Group listed in the byline) and/or Subgroup (eg, Steering Committee) |
|-----------------------------------|------------------|-----------------------|------------------|------------------------------------|------------------------------------------|---------------------------------------------------------|--------------------------------------------------------------------------------------------|
| Ellen                             | Anderson         |                       | MS, RD           | Massachusetts General Hospital     | Boston, MA                               |                                                         |                                                                                            |
| Laurie                            | Bissett          |                       | MS, RD           | Massachusetts General Hospital     | Boston, MA                               |                                                         |                                                                                            |
| Kristy                            | Bondi            |                       | BS               | Massachusetts General Hospital     | Boston, MA                               |                                                         |                                                                                            |
| Enrico                            | Cagliero         |                       | MD               | Massachusetts General Hospital     | Boston, MA                               |                                                         |                                                                                            |
| Jose C.                           | Florez           |                       | MD, PhD          | Massachusetts General Hospital     | Boston, MA                               |                                                         |                                                                                            |
| Linda                             | Delahanty        |                       | MS, RD           | Massachusetts General Hospital     | Boston, MA                               |                                                         |                                                                                            |
| Valerie                           | Goldman          |                       | MS, RD           | Massachusetts General Hospital     | Boston, MA                               |                                                         |                                                                                            |
| Elaine                            | Grassa           |                       |                  | Massachusetts General Hospital     | Boston, MA                               |                                                         |                                                                                            |
| Lindsery                          | Gurry            |                       | RN, CDE, B       | Massachusetts General Hospital     | Boston, MA                               |                                                         |                                                                                            |
| Kali                              | D'Anna           |                       |                  | Massachusetts General Hospital     | Boston, MA                               |                                                         |                                                                                            |
| Fernelle                          | Leandre          |                       | BS               | Massachusetts General Hospital     | Boston, MA                               |                                                         |                                                                                            |
| Peter                             | Lou              |                       | MD               | Massachusetts General Hospital     | Boston, MA                               |                                                         |                                                                                            |
| Alexandra                         | Poulos           |                       |                  | Massachusetts General Hospital     | Boston, MA                               |                                                         |                                                                                            |
| Elyse                             | Raymond          |                       | BS               | Massachusetts General Hospital     | Boston, MA                               |                                                         |                                                                                            |
| Valerie                           | Ripley           |                       | BS               | Massachusetts General Hospital     | Boston, MA                               |                                                         |                                                                                            |
| Christine                         | Stevens          |                       | RN               | Massachusetts General Hospital     | Boston, MA                               |                                                         |                                                                                            |
| Beverly                           | Tseng            |                       |                  | Massachusetts General Hospital     | Boston, MA                               |                                                         |                                                                                            |
| Jerrold M.                        | Olefsky          |                       | MD               | University of California-San Diego | La Jolla, CA                             | Principal Investigator                                  |                                                                                            |
| Elizabeth                         | Barrett-Connor   |                       | MD               | University of California-San Diego | La Jolla, CA                             | Principal Investigator                                  |                                                                                            |
| Sunder                            | Mudaliar         |                       | MD               | University of California-San Diego | La Jolla, CA                             | Principal Investigator                                  |                                                                                            |
| Maria Rosario                     | Araneta          |                       | PhD              | University of California-San Diego | La Jolla, CA                             | Principal Investigator                                  |                                                                                            |
| Mary Lou                          | Carrion-Petersen |                       | RN, BSN          | University of California-San Diego | La Jolla, CA                             | Program Coordinator                                     |                                                                                            |
| Karen                             | Vejvoda          |                       | RN, BSN, C       | University of California-San Diego | La Jolla, CA                             | Program Coordinator                                     |                                                                                            |
| Sarah                             | Bassiouni        |                       | MPH              | University of California-San Diego | La Jolla, CA                             |                                                         |                                                                                            |
| Madeline                          | Beltran          |                       | RN, BSN, C       | University of California-San Diego | La Jolla, CA                             |                                                         |                                                                                            |
| Lauren N.                         | Claravall        |                       | BS               | University of California-San Diego | La Jolla, CA                             |                                                         |                                                                                            |
| Jonalle M.                        | Dowden           |                       | BS               | University of California-San Diego | La Jolla, CA                             |                                                         |                                                                                            |
| Steven V.                         | Edelman          |                       | MD               | University of California-San Diego | La Jolla, CA                             |                                                         |                                                                                            |
| Pranav                            | Garimella        |                       | MBBS             | University of California-San Diego | La Jolla, CA                             |                                                         |                                                                                            |

## Supplemental Online Content: Nonauthor Collaborators

\*First name, last name, and suffix (if applicable) are required and will appear in PubMed.

| *First Name and Middle Initial(s) | *Last Name   | *Suffix (eg, Jr, III) | Academic Degrees | Institution                        | Location (city, state/province, country) | Role or Contribution, eg, chair, principal investigator | Group (if more than 1 Group listed in the byline) and/or Subgroup (eg, Steering Committee) |
|-----------------------------------|--------------|-----------------------|------------------|------------------------------------|------------------------------------------|---------------------------------------------------------|--------------------------------------------------------------------------------------------|
| Robert R.                         | Henry        |                       | MD               | University of California-San Diego | La Jolla, CA                             |                                                         |                                                                                            |
| Javiva                            | Horne        |                       | RD               | University of California-San Diego | La Jolla, CA                             |                                                         |                                                                                            |
| Marycie                           | Lamkin       |                       | RN               | University of California-San Diego | La Jolla, CA                             |                                                         |                                                                                            |
| Simona Szerdi                     | Janesch      |                       | BA               | University of California-San Diego | La Jolla, CA                             |                                                         |                                                                                            |
| Diana                             | Leos         |                       |                  | University of California-San Diego | La Jolla, CA                             |                                                         |                                                                                            |
| William                           | Polonsky     |                       | PhD              | University of California-San Diego | La Jolla, CA                             |                                                         |                                                                                            |
| Rosa                              | Ruiz         |                       |                  | University of California-San Diego | La Jolla, CA                             |                                                         |                                                                                            |
| Jean                              | Smith        |                       | RN               | University of California-San Diego | La Jolla, CA                             |                                                         |                                                                                            |
| Jennifer                          | Torio-Hurley |                       |                  | University of California-San Diego | La Jolla, CA                             |                                                         |                                                                                            |
| F. Xavier                         | Pi-Sunyer    |                       | MD               | Columbia University                | New York, NY                             | Principal Investigator                                  |                                                                                            |
| Jane E.                           | Lee          |                       | MS               | Columbia University                | New York, NY                             | Program Coordinator                                     |                                                                                            |
| Susan                             | Hagaman      |                       | MS, RN, CD       | Columbia University                | New York, NY                             | Program Coordinator                                     |                                                                                            |
| David B.                          | Allison      |                       | PhD              | Columbia University                | New York, NY                             |                                                         |                                                                                            |
| Nnenna                            | Agharanya    |                       |                  | Columbia University                | New York, NY                             |                                                         |                                                                                            |
| Nancy J.                          | Aronoff      |                       | MS, RD           | Columbia University                | New York, NY                             |                                                         |                                                                                            |
| Maria                             | Baldo        |                       |                  | Columbia University                | New York, NY                             |                                                         |                                                                                            |
| Jill P.                           | Crandall     |                       | MD               | Columbia University                | New York, NY                             |                                                         |                                                                                            |
| Sandra T.                         | Foo          |                       | MD               | Columbia University                | New York, NY                             |                                                         |                                                                                            |
| Jose A.                           | Luchsinger   |                       | MD, MPH          | Columbia University                | New York, NY                             |                                                         |                                                                                            |
| Carmen                            | Pal          |                       | MD               | Columbia University                | New York, NY                             |                                                         |                                                                                            |
| Kathy                             | Parkes       |                       | RN               | Columbia University                | New York, NY                             |                                                         |                                                                                            |
| Mary Beth                         | Pena         |                       | RN               | Columbia University                | New York, NY                             |                                                         |                                                                                            |
| Ellen S.                          | Rooney       |                       | BA               | Columbia University                | New York, NY                             |                                                         |                                                                                            |
| Gretchen E.H.                     | Van Wye      |                       | MA               | Columbia University                | New York, NY                             |                                                         |                                                                                            |
| Kristine A.                       | Viscovich    |                       | ANP              | Columbia University                | New York, NY                             |                                                         |                                                                                            |
| Mary                              | de Groot     |                       | PhD              | Indiana University                 | Indianapolis, IN                         | Principal Investigator                                  |                                                                                            |
| David G.                          | Marrero      |                       | PhD              | Indiana University                 | Indianapolis, IN                         | Principal Investigator                                  |                                                                                            |
| Kieren J.                         | Mather       |                       | MD               | Indiana University                 | Indianapolis, IN                         | Principal Investigator                                  |                                                                                            |
| Melvin J.                         | Prince       |                       | MD               | Indiana University                 | Indianapolis, IN                         | Principal Investigator                                  |                                                                                            |

## Supplemental Online Content: Nonauthor Collaborators

\*First name, last name, and suffix (if applicable) are required and will appear in PubMed.

| *First Name and Middle Initial(s) | *Last Name | *Suffix (eg, Jr, III) | Academic Degrees | Institution                | Location (city, state/province, country) | Role or Contribution, eg, chair, principal investigator | Group (if more than 1 Group listed in the byline) and/or Subgroup (eg, Steering Committee) |
|-----------------------------------|------------|-----------------------|------------------|----------------------------|------------------------------------------|---------------------------------------------------------|--------------------------------------------------------------------------------------------|
| Susie M.                          | Kelly      |                       | RN, CDE          | Indiana University         | Indianapolis, IN                         | Program Coordinator                                     |                                                                                            |
| Marcia A.                         | Jackson    |                       |                  | Indiana University         | Indianapolis, IN                         | Program Coordinator                                     |                                                                                            |
| Gina                              | McAtee     |                       |                  | Indiana University         | Indianapolis, IN                         | Program Coordinator                                     |                                                                                            |
| Paula                             | Putenney   |                       | RN               | Indiana University         | Indianapolis, IN                         | Program Coordinator                                     |                                                                                            |
| Ronald T.                         | Ackermann  |                       | MD               | Indiana University         | Indianapolis, IN                         |                                                         |                                                                                            |
| Carolyn M.                        | Cantrell   |                       |                  | Indiana University         | Indianapolis, IN                         |                                                         |                                                                                            |
| Yolanda F.                        | Dotson     |                       | BS               | Indiana University         | Indianapolis, IN                         |                                                         |                                                                                            |
| Edwin S.                          | Fineberg   |                       | MD               | Indiana University         | Indianapolis, IN                         |                                                         |                                                                                            |
| Megan                             | Fultz      |                       |                  | Indiana University         | Indianapolis, IN                         |                                                         |                                                                                            |
| John C.                           | Guare      |                       | PhD              | Indiana University         | Indianapolis, IN                         |                                                         |                                                                                            |
| Angela                            | Hadden     |                       |                  | Indiana University         | Indianapolis, IN                         |                                                         |                                                                                            |
| James M.                          | Ignaut     |                       | MA               | Indiana University         | Indianapolis, IN                         |                                                         |                                                                                            |
| Marion S.                         | Kirkman    |                       | MD               | Indiana University         | Indianapolis, IN                         |                                                         |                                                                                            |
| Erin O'Kelly                      | Phillips   |                       |                  | Indiana University         | Indianapolis, IN                         |                                                         |                                                                                            |
| Kisha L                           | Pinner     |                       |                  | Indiana University         | Indianapolis, IN                         |                                                         |                                                                                            |
| Beverly D.                        | Porter     |                       | MS               | Indiana University         | Indianapolis, IN                         |                                                         |                                                                                            |
| Paris J.                          | Roach      |                       | MD               | Indiana University         | Indianapolis, IN                         |                                                         |                                                                                            |
| Nancy D.                          | Rowland    |                       | BS, MS           | Indiana University         | Indianapolis, IN                         |                                                         |                                                                                            |
| Madelyn L.                        | Wheeler    |                       | RD               | Indiana University         | Indianapolis, IN                         |                                                         |                                                                                            |
| Vanita                            | Aroda      |                       | MD               | Medstar Research Institute | Washington, DC                           | Principal Investigator                                  |                                                                                            |
| Michelle                          | Magee      |                       | MD               | Medstar Research Institute | Washington, DC                           | Principal Investigator                                  |                                                                                            |
| Robert E.                         | Ratner     |                       | MD               | Medstar Research Institute | Washington, DC                           | Principal Investigator                                  |                                                                                            |
| Gretchen                          | Youssef    |                       | RD, CDE          | Medstar Research Institute | Washington, DC                           | Program Coordinator                                     |                                                                                            |
| Sue                               | Shapiro    |                       | RN, BSN, C       | Medstar Research Institute | Washington, DC                           | Program Coordinator                                     |                                                                                            |
| Natalie                           | Andon      |                       | RN               | Medstar Research Institute | Washington, DC                           |                                                         |                                                                                            |

## Supplemental Online Content: Nonauthor Collaborators

\*First name, last name, and suffix (if applicable) are required and will appear in PubMed.

| *First Name and Middle Initial(s) | *Last Name    | *Suffix (eg, Jr, III) | Academic Degrees | Institution                                                | Location (city, state/province, country) | Role or Contribution, eg, chair, principal investigator | Group (if more than 1 Group listed in the byline) and/or Subgroup (eg, Steering Committee) |
|-----------------------------------|---------------|-----------------------|------------------|------------------------------------------------------------|------------------------------------------|---------------------------------------------------------|--------------------------------------------------------------------------------------------|
| Catherine                         | Bavido-Arrage |                       | MS, RD, LD       | Medstar Research Institute                                 | Washington, DC                           |                                                         |                                                                                            |
| Geraldine                         | Boggs         |                       | MS, RN           | Medstar Research Institute                                 | Washington, DC                           |                                                         |                                                                                            |
| Marjorie                          | Bronsdord     |                       | MS, RD, CD       | Medstar Research Institute                                 | Washington, DC                           |                                                         |                                                                                            |
| Ernestine                         | Brown         |                       |                  | Medstar Research Institute                                 | Washington, DC                           |                                                         |                                                                                            |
| Holly                             | Love Burkott  |                       | RN               | Medstar Research Institute                                 | Washington, DC                           |                                                         |                                                                                            |
| Wayman W.                         | Cheatham      |                       | MD               | Medstar Research Institute                                 | Washington, DC                           |                                                         |                                                                                            |
| Susan                             | Cola          |                       |                  | Medstar Research Institute                                 | Washington, DC                           |                                                         |                                                                                            |
| Cindy                             | Evans         |                       |                  | Medstar Research Institute                                 | Washington, DC                           |                                                         |                                                                                            |
| Peggy                             | Gibbs         |                       |                  | Medstar Research Institute                                 | Washington, DC                           |                                                         |                                                                                            |
| Tracy                             | Kellum        |                       | MS, RD, CD       | Medstar Research Institute                                 | Washington, DC                           |                                                         |                                                                                            |
| Lilia                             | Leon          |                       |                  | Medstar Research Institute                                 | Washington, DC                           |                                                         |                                                                                            |
| Milvia                            | Lagarda       |                       |                  | Medstar Research Institute                                 | Washington, DC                           |                                                         |                                                                                            |
| Claresa                           | Levatan       |                       | MD               | Medstar Research Institute                                 | Washington, DC                           |                                                         |                                                                                            |
| Milajurine                        | Lindsay       |                       |                  | Medstar Research Institute                                 | Washington, DC                           |                                                         |                                                                                            |
| Asha K.                           | Nair          |                       | BS               | Medstar Research Institute                                 | Washington, DC                           |                                                         |                                                                                            |
| Jean                              | Park          |                       | MD               | Medstar Research Institute                                 | Washington, DC                           |                                                         |                                                                                            |
| Maureen                           | Passaro       |                       | MD               | Medstar Research Institute                                 | Washington, DC                           |                                                         |                                                                                            |
| Angela                            | Silverman     |                       |                  | Medstar Research Institute                                 | Washington, DC                           |                                                         |                                                                                            |
| Gabriel                           | Uwaifo        |                       | MD               | Medstar Research Institute                                 | Washington, DC                           |                                                         |                                                                                            |
| Debra                             | Wells-Thayer  |                       | NP, CDE          | Medstar Research Institute                                 | Washington, DC                           |                                                         |                                                                                            |
| Renee                             | Wiggins       |                       | RD               | Medstar Research Institute                                 | Washington, DC                           |                                                         |                                                                                            |
| Mohammed F.                       | Saad          |                       | MD               | University of Southern California/<br>UCLA Research Center | Alhambra, CA                             | Principal Investigator                                  |                                                                                            |
| Karol                             | Watson        |                       | MD               | University of Southern California/<br>UCLA Research Center | Alhambra, CA                             | Principal Investigator                                  |                                                                                            |
| Maria                             | Budget        |                       |                  | University of Southern California/<br>UCLA Research Center | Alhambra, CA                             | Program Coordinator                                     |                                                                                            |
| Sujata                            | Jinagouda     |                       | MD               | University of Southern California/<br>UCLA Research Center | Alhambra, CA                             | Program Coordinator                                     |                                                                                            |
| Medhat                            | Botrous       |                       | MD               | University of Southern California/<br>UCLA Research Center | Alhambra, CA                             | Program Coordinator                                     |                                                                                            |

Supplemental Online Content: Nonauthor Collaborators

\*First name, last name, and suffix (if applicable) are required and will appear in PubMed.

| *First Name and Middle Initial(s) | *Last Name    | *Suffix (eg, Jr, III) | Academic Degrees | Institution                                                | Location (city, state/province, country) | Role or Contribution, eg, chair, principal investigator | Group (if more than 1 Group listed in the byline) and/or Subgroup (eg, Steering Committee) |
|-----------------------------------|---------------|-----------------------|------------------|------------------------------------------------------------|------------------------------------------|---------------------------------------------------------|--------------------------------------------------------------------------------------------|
| Anthony                           | Sosa          |                       |                  | University of Southern California/<br>UCLA Research Center | Alhambra, CA                             | Program Coordinator                                     |                                                                                            |
| Sameh                             | Tadros        |                       |                  | University of Southern California/<br>UCLA Research Center | Alhambra, CA                             | Program Coordinator                                     |                                                                                            |
| Khan                              | Akbar         |                       | MD               | University of Southern California/<br>UCLA Research Center | Alhambra, CA                             |                                                         |                                                                                            |
| Claudia                           | Conzues       |                       |                  | University of Southern California/<br>UCLA Research Center | Alhambra, CA                             |                                                         |                                                                                            |
| Perpetua                          | Magpuri       |                       |                  | University of Southern California/<br>UCLA Research Center | Alhambra, CA                             |                                                         |                                                                                            |
| Kathy                             | Ngo           |                       |                  | University of Southern California/<br>UCLA Research Center | Alhambra, CA                             |                                                         |                                                                                            |
| Amer                              | Rassam        |                       | MD               | University of Southern California/<br>UCLA Research Center | Alhambra, CA                             |                                                         |                                                                                            |
| Debra                             | Waters        |                       |                  | University of Southern California/<br>UCLA Research Center | Alhambra, CA                             |                                                         |                                                                                            |
| Kathy                             | Xaphthalamous |                       |                  | University of Southern California/<br>UCLA Research Center | Alhambra, CA                             |                                                         |                                                                                            |
|                                   |               |                       |                  |                                                            |                                          |                                                         |                                                                                            |
| Julio V.                          | Santiago      |                       | MD               | Washington University                                      | St. Louis, MO                            |                                                         |                                                                                            |
| Samuel                            | Dagogo-Jack   |                       | MD, MSc, F       | Washington University                                      | St. Louis, MO                            |                                                         |                                                                                            |
| Angela L.                         | Brown         |                       | MD               | Washington University                                      | St. Louis, MO                            |                                                         |                                                                                            |
| Samia                             | Das           |                       | MS, MBA, F       | Washington University                                      | St. Louis, MO                            | Program Coordinator                                     |                                                                                            |
| Prajakta                          | Khare-Ranade  |                       | MS, RDN, LI      | Washington University                                      | St. Louis, MO                            | Program Coordinator                                     |                                                                                            |
| Tamara                            | Stich         |                       | RN, MSN, C       | Washington University                                      | St. Louis, MO                            | Program Coordinator                                     |                                                                                            |
| Ana                               | Santiago      |                       | RN               | Washington University                                      | St. Louis, MO                            |                                                         |                                                                                            |
| Edwin                             | Fisher        |                       | PhD              | Washington University                                      | St. Louis, MO                            |                                                         |                                                                                            |
| Emma                              | Hurt          |                       | RN               | Washington University                                      | St. Louis, MO                            |                                                         |                                                                                            |

Supplemental Online Content: Nonauthor Collaborators

\*First name, last name, and suffix (if applicable) are required and will appear in PubMed.

| *First Name and Middle Initial(s) | *Last Name   | *Suffix (eg, Jr, III) | Academic Degrees | Institution              | Location (city, state/province, country) | Role or Contribution, eg, chair, principal investigator | Group (if more than 1 Group listed in the byline) and/or Subgroup (eg, Steering Committee) |
|-----------------------------------|--------------|-----------------------|------------------|--------------------------|------------------------------------------|---------------------------------------------------------|--------------------------------------------------------------------------------------------|
| Tracy                             | Jones        |                       | RN               | Washington University    | St. Louis, MO                            |                                                         |                                                                                            |
| Michelle                          | Kerr         |                       | RD               | Washington University    | St. Louis, MO                            |                                                         |                                                                                            |
| Lucy                              | Ryder        |                       | RN               | Washington University    | St. Louis, MO                            |                                                         |                                                                                            |
| Cormarie                          | Wernimont    |                       | RD, LD           | Washington University    | St. Louis, MO                            |                                                         |                                                                                            |
|                                   |              |                       |                  |                          |                                          |                                                         |                                                                                            |
| Sherita Hill                      | Golden       |                       | MD, MHS,         | Johns Hopkins University | Baltimore, MD                            | Principal Investigator                                  |                                                                                            |
| Christopher D.                    | Saudek       |                       | MD               | Johns Hopkins University | Baltimore, MD                            | Principal Investigator                                  |                                                                                            |
| Vanessa                           | Bradley      |                       | BA               | Johns Hopkins University | Baltimore, MD                            | Program Coordinator                                     |                                                                                            |
| Emily                             | Sullivan     |                       | MEd, RN          | Johns Hopkins University | Baltimore, MD                            | Program Coordinator                                     |                                                                                            |
| Tracy                             | Whittington  |                       | BS               | Johns Hopkins University | Baltimore, MD                            | Program Coordinator                                     |                                                                                            |
| Caroline                          | Abbas        |                       |                  | Johns Hopkins University | Baltimore, MD                            |                                                         |                                                                                            |
| Adrienne                          | Allen        |                       |                  | Johns Hopkins University | Baltimore, MD                            |                                                         |                                                                                            |
| Frederick L.                      | Brancati     |                       | MD, MHS          | Johns Hopkins University | Baltimore, MD                            |                                                         |                                                                                            |
| Sharon                            | Cappelli     |                       |                  | Johns Hopkins University | Baltimore, MD                            |                                                         |                                                                                            |
| Jeanne M.                         | Clark        |                       | MD               | Johns Hopkins University | Baltimore, MD                            |                                                         |                                                                                            |
| Jeanne B.                         | Charleston   |                       | RN, MSN          | Johns Hopkins University | Baltimore, MD                            |                                                         |                                                                                            |
| Janice                            | Freel        |                       |                  | Johns Hopkins University | Baltimore, MD                            |                                                         |                                                                                            |
| Katherine                         | Horak        |                       | RD               | Johns Hopkins University | Baltimore, MD                            |                                                         |                                                                                            |
| Alicia                            | Greene       |                       |                  | Johns Hopkins University | Baltimore, MD                            |                                                         |                                                                                            |
| Dawn                              | Jiggetts     |                       |                  | Johns Hopkins University | Baltimore, MD                            |                                                         |                                                                                            |
| Deloris                           | Johnson      |                       |                  | Johns Hopkins University | Baltimore, MD                            |                                                         |                                                                                            |
| Hope                              | Joseph       |                       |                  | Johns Hopkins University | Baltimore, MD                            |                                                         |                                                                                            |
| Kimberly                          | Loman        |                       |                  | Johns Hopkins University | Baltimore, MD                            |                                                         |                                                                                            |
| Nestoras                          | Mathioudakis |                       | MD, MHS          | Johns Hopkins University | Baltimore, MD                            |                                                         |                                                                                            |
| Henry                             | Mosley       |                       |                  | Johns Hopkins University | Baltimore, MD                            |                                                         |                                                                                            |
| John                              | Reusing      |                       |                  | Johns Hopkins University | Baltimore, MD                            |                                                         |                                                                                            |
| Richard R.                        | Rubin        |                       | PhD              | Johns Hopkins University | Baltimore, MD                            |                                                         |                                                                                            |
| Alafia                            | Samuels      |                       | MD               | Johns Hopkins University | Baltimore, MD                            |                                                         |                                                                                            |



## Supplemental Online Content: Nonauthor Collaborators

\*First name, last name, and suffix (if applicable) are required and will appear in PubMed.

| *First Name and Middle Initial(s) | *Last Name         | *Suffix (eg, Jr, III) | Academic Degrees | Institution              | Location (city, state/province, country) | Role or Contribution, eg, chair, principal investigator | Group (if more than 1 Group listed in the byline) and/or Subgroup (eg, Steering Committee) |
|-----------------------------------|--------------------|-----------------------|------------------|--------------------------|------------------------------------------|---------------------------------------------------------|--------------------------------------------------------------------------------------------|
| Thomas                            | Shields            |                       |                  | Johns Hopkins University | Baltimore, MD                            |                                                         |                                                                                            |
| Shawne                            | Stephens           |                       |                  | Johns Hopkins University | Baltimore, MD                            |                                                         |                                                                                            |
| Kerry J.                          | Stewart            |                       | EdD              | Johns Hopkins University | Baltimore, MD                            |                                                         |                                                                                            |
| LeeLana                           | Thomas             |                       |                  | Johns Hopkins University | Baltimore, MD                            |                                                         |                                                                                            |
| Evonne                            | Utsey              |                       |                  | Johns Hopkins University | Baltimore, MD                            |                                                         |                                                                                            |
| Paula                             | Williamson         |                       |                  | Johns Hopkins University | Baltimore, MD                            |                                                         |                                                                                            |
|                                   |                    |                       |                  |                          |                                          |                                                         |                                                                                            |
| David S.                          | Schade             |                       | MD               | University of New Mexico | Albuquerque, NM                          | Principal Investigator                                  |                                                                                            |
| Karwyn S.                         | Adams              |                       | RN, MSN          | University of New Mexico | Albuquerque, NM                          | Program Coordinator                                     |                                                                                            |
| Janene L.                         | Canady             |                       | RN, CDE          | University of New Mexico | Albuquerque, NM                          | Program Coordinator                                     |                                                                                            |
| Carolyn                           | Johannes           |                       | RN, CDE          | University of New Mexico | Albuquerque, NM                          | Program Coordinator                                     |                                                                                            |
| Claire                            | Hemphill           |                       | RN, BSN          | University of New Mexico | Albuquerque, NM                          | Program Coordinator                                     |                                                                                            |
| Penny                             | Hyde               |                       | RN, BSN          | University of New Mexico | Albuquerque, NM                          | Program Coordinator                                     |                                                                                            |
| Leslie F.                         | Atler              |                       | PhD              | University of New Mexico | Albuquerque, NM                          |                                                         |                                                                                            |
| Patrick J.                        | Boyle              |                       | MD               | University of New Mexico | Albuquerque, NM                          |                                                         |                                                                                            |
| Mark R.                           | Burge              |                       | MD               | University of New Mexico | Albuquerque, NM                          |                                                         |                                                                                            |
| Lisa                              | Chai               |                       | RN               | University of New Mexico | Albuquerque, NM                          |                                                         |                                                                                            |
| Kathleen                          | Colleran           |                       | MD               | University of New Mexico | Albuquerque, NM                          |                                                         |                                                                                            |
| Ateka                             | Fondino            |                       |                  | University of New Mexico | Albuquerque, NM                          |                                                         |                                                                                            |
| Ysela                             | Gonzales           |                       |                  | University of New Mexico | Albuquerque, NM                          |                                                         |                                                                                            |
| Doris A.                          | Hernandez-McGinnis |                       |                  | University of New Mexico | Albuquerque, NM                          |                                                         |                                                                                            |
| Patricia                          | Katz               |                       | LPN              | University of New Mexico | Albuquerque, NM                          |                                                         |                                                                                            |
| Carolyn                           | King               |                       | Med              | University of New Mexico | Albuquerque, NM                          |                                                         |                                                                                            |
| Julia                             | Middendorf         |                       | RN               | University of New Mexico | Albuquerque, NM                          |                                                         |                                                                                            |
| Amer                              | Rassam             |                       | MD               | University of New Mexico | Albuquerque, NM                          |                                                         |                                                                                            |

## Supplemental Online Content: Nonauthor Collaborators

\*First name, last name, and suffix (if applicable) are required and will appear in PubMed.

| *First Name and Middle Initial(s) | *Last Name     | *Suffix (eg, Jr, III) | Academic Degrees | Institution                         | Location (city, state/province, country) | Role or Contribution, eg, chair, principal investigator | Group (if more than 1 Group listed in the byline) and/or Subgroup (eg, Steering Committee) |
|-----------------------------------|----------------|-----------------------|------------------|-------------------------------------|------------------------------------------|---------------------------------------------------------|--------------------------------------------------------------------------------------------|
| Sofya                             | Rubinchik      |                       | MD               | University of New Mexico            | Albuquerque, NM                          |                                                         |                                                                                            |
| Willette                          | Senter         |                       | RD               | University of New Mexico            | Albuquerque, NM                          |                                                         |                                                                                            |
| Debra                             | Waters         |                       | PhD              | University of New Mexico            | Albuquerque, NM                          |                                                         |                                                                                            |
| Jill                              | Crandall       |                       | MD               | Albert Einstein College of Medicine | Bronx, NY                                | Principal Investigator                                  |                                                                                            |
| Harry                             | Shamoon        |                       | MD               | Albert Einstein College of Medicine | Bronx, NY                                | Principal Investigator                                  |                                                                                            |
| Janet O.                          | Brown          |                       | RN, MPH, M       | Albert Einstein College of Medicine | Bronx, NY                                | Program Coordinator                                     |                                                                                            |
| Gilda                             | Trandafirescu  |                       | MD               | Albert Einstein College of Medicine | Bronx, NY                                | Program Coordinator                                     |                                                                                            |
| Danielle                          | Powell         |                       | MPH              | Albert Einstein College of Medicine | Bronx, NY                                |                                                         |                                                                                            |
| Elsie                             | Adorno         |                       | BS               | Albert Einstein College of Medicine | Bronx, NY                                |                                                         |                                                                                            |
| Liane                             | Cox            |                       | MS, RD           | Albert Einstein College of Medicine | Bronx, NY                                |                                                         |                                                                                            |
| Helena                            | Duffy          |                       | MS, C-ANP        | Albert Einstein College of Medicine | Bronx, NY                                |                                                         |                                                                                            |
| Samuel                            | Engel          |                       | MD               | Albert Einstein College of Medicine | Bronx, NY                                |                                                         |                                                                                            |
| Allison                           | Friedler       |                       | BS               | Albert Einstein College of Medicine | Bronx, NY                                |                                                         |                                                                                            |
| Angela                            | Goldstein      |                       | FNP-C, NPP       | Albert Einstein College of Medicine | Bronx, NY                                |                                                         |                                                                                            |
| Crystal J.                        | Howard-Century |                       | MA               | Albert Einstein College of Medicine | Bronx, NY                                |                                                         |                                                                                            |
| Jennifer                          | Lukin          |                       | BA               | Albert Einstein College of Medicine | Bronx, NY                                |                                                         |                                                                                            |

Supplemental Online Content: Nonauthor Collaborators

\*First name, last name, and suffix (if applicable) are required and will appear in PubMed.

| *First Name and Middle Initial(s) | *Last Name   | *Suffix (eg, Jr, III) | Academic Degrees | Institution                         | Location (city, state/province, country) | Role or Contribution, eg, chair, principal investigator | Group (if more than 1 Group listed in the byline) and/or Subgroup (eg, Steering Committee) |
|-----------------------------------|--------------|-----------------------|------------------|-------------------------------------|------------------------------------------|---------------------------------------------------------|--------------------------------------------------------------------------------------------|
| Stacey                            | Kloiber      |                       | RN               | Albert Einstein College of Medicine | Bronx, NY                                |                                                         |                                                                                            |
| Nadege                            | Longchamp    |                       | LPN              | Albert Einstein College of Medicine | Bronx, NY                                |                                                         |                                                                                            |
| Helen                             | Martinez     |                       | RN, MSN, F       | Albert Einstein College of Medicine | Bronx, NY                                |                                                         |                                                                                            |
| Dorothy                           | Pompi        |                       | BA               | Albert Einstein College of Medicine | Bronx, NY                                |                                                         |                                                                                            |
| Jonathan                          | Scheindlin   |                       | MD               | Albert Einstein College of Medicine | Bronx, NY                                |                                                         |                                                                                            |
| Elissa                            | Violino      |                       | RD, MS           | Albert Einstein College of Medicine | Bronx, NY                                |                                                         |                                                                                            |
| Elizabeth A.                      | Walker       |                       | RN, PhD          | Albert Einstein College of Medicine | Bronx, NY                                |                                                         |                                                                                            |
| Judith                            | Wylie-Rosett |                       | EdD, RD          | Albert Einstein College of Medicine | Bronx, NY                                |                                                         |                                                                                            |
| Elise                             | Zimmerman    |                       | RD, MS           | Albert Einstein College of Medicine | Bronx, NY                                |                                                         |                                                                                            |
| Joel                              | Zonszein     |                       | MD               | Albert Einstein College of Medicine | Bronx, NY                                |                                                         |                                                                                            |
| Trevor                            | Orchard      |                       | MD               | University of Pittsburgh            | Pittsburgh, PA                           | Principal Investigator                                  |                                                                                            |
| Elizabeth                         | Venditti     |                       | PhD              | University of Pittsburgh            | Pittsburgh, PA                           | Principal Investigator                                  |                                                                                            |
| Rena R.                           | Wing         |                       | PhD              | University of Pittsburgh            | Pittsburgh, PA                           | Principal Investigator                                  |                                                                                            |
| Susan                             | Jeffries     |                       | RN, MSN          | University of Pittsburgh            | Pittsburgh, PA                           | Program Coordinator                                     |                                                                                            |
| Gaye                              | Koenning     |                       | MS, RD           | University of Pittsburgh            | Pittsburgh, PA                           | Program Coordinator                                     |                                                                                            |
| M. Kaye                           | Kramer       |                       | BSN, MPH         | University of Pittsburgh            | Pittsburgh, PA                           | Program Coordinator                                     |                                                                                            |
| Marie                             | Smith        |                       | RN, BSN          | University of Pittsburgh            | Pittsburgh, PA                           | Program Coordinator                                     |                                                                                            |

## Supplemental Online Content: Nonauthor Collaborators

\*First name, last name, and suffix (if applicable) are required and will appear in PubMed.

| *First Name and Middle Initial(s) | *Last Name      | *Suffix (eg, Jr, III) | Academic Degrees | Institution              | Location (city, state/province, country) | Role or Contribution, eg, chair, principal investigator | Group (if more than 1 Group listed in the byline) and/or Subgroup (eg, Steering Committee) |
|-----------------------------------|-----------------|-----------------------|------------------|--------------------------|------------------------------------------|---------------------------------------------------------|--------------------------------------------------------------------------------------------|
| Susan                             | Barr            |                       | BS               | University of Pittsburgh | Pittsburgh, PA                           |                                                         |                                                                                            |
| Catherine                         | Benchoff        |                       |                  | University of Pittsburgh | Pittsburgh, PA                           |                                                         |                                                                                            |
| Miriam                            | Boraz           |                       | PhD              | University of Pittsburgh | Pittsburgh, PA                           |                                                         |                                                                                            |
| Lisa                              | Clifford        |                       | BS               | University of Pittsburgh | Pittsburgh, PA                           |                                                         |                                                                                            |
| Rebecca                           | Culyba          |                       | BS               | University of Pittsburgh | Pittsburgh, PA                           |                                                         |                                                                                            |
| Marlene                           | Frazier         |                       |                  | University of Pittsburgh | Pittsburgh, PA                           |                                                         |                                                                                            |
| Ryan                              | Gilligan        |                       | BS               | University of Pittsburgh | Pittsburgh, PA                           |                                                         |                                                                                            |
| Stephanie                         | Guimond         |                       | BS               | University of Pittsburgh | Pittsburgh, PA                           |                                                         |                                                                                            |
| Susan                             | Harrier         |                       | MLT              | University of Pittsburgh | Pittsburgh, PA                           |                                                         |                                                                                            |
| Louann                            | Harris          |                       | RN               | University of Pittsburgh | Pittsburgh, PA                           |                                                         |                                                                                            |
| Andrea                            | Kriska          |                       | PhD              | University of Pittsburgh | Pittsburgh, PA                           |                                                         |                                                                                            |
| Qurashia                          | Manjoo          |                       | MD               | University of Pittsburgh | Pittsburgh, PA                           |                                                         |                                                                                            |
| Monica                            | Mullen          |                       | MHP, RD          | University of Pittsburgh | Pittsburgh, PA                           |                                                         |                                                                                            |
| Alicia                            | Noel            |                       | BS               | University of Pittsburgh | Pittsburgh, PA                           |                                                         |                                                                                            |
| Amy                               | Otto            |                       | PhD              | University of Pittsburgh | Pittsburgh, PA                           |                                                         |                                                                                            |
| Jessica                           | Pettigrew       |                       | CMA              | University of Pittsburgh | Pittsburgh, PA                           |                                                         |                                                                                            |
| Bonny                             | Rockette-Wagner |                       | PhD              | University of Pittsburgh | Pittsburgh, PA                           |                                                         |                                                                                            |
| Debra                             | Rubinstein      |                       | MD               | University of Pittsburgh | Pittsburgh, PA                           |                                                         |                                                                                            |
| Linda                             | Semler          |                       | MS, RD           | University of Pittsburgh | Pittsburgh, PA                           |                                                         |                                                                                            |
| Cheryl F.                         | Smith           |                       | PhD              | University of Pittsburgh | Pittsburgh, PA                           |                                                         |                                                                                            |
| Valarie                           | Weinzierl       |                       | MPH              | University of Pittsburgh | Pittsburgh, PA                           |                                                         |                                                                                            |
| Katherine V.                      | Williams        |                       | MD, MPH          | University of Pittsburgh | Pittsburgh, PA                           |                                                         |                                                                                            |
| Tara                              | Wilson          |                       | BA               | University of Pittsburgh | Pittsburgh, PA                           |                                                         |                                                                                            |
| Marjorie K.                       | Mau             |                       | MD               | University of Hawaii     | Honolulu, HI                             | Principal Investigator                                  |                                                                                            |
| Narleen K.                        | Baker-Ladao     |                       | BS               | University of Hawaii     | Honolulu, HI                             | Program Coordinator                                     |                                                                                            |
| John S.                           | Melish          |                       | MD               | University of Hawaii     | Honolulu, HI                             |                                                         |                                                                                            |
| Richard F.                        | Arakaki         |                       | MD               | University of Hawaii     | Honolulu, HI                             | Principal Investigator                                  |                                                                                            |
| Renee W.                          | Latimer         |                       | BSN, MPH         | University of Hawaii     | Honolulu, HI                             | Program Coordinator                                     |                                                                                            |

## Supplemental Online Content: Nonauthor Collaborators

\*First name, last name, and suffix (if applicable) are required and will appear in PubMed.

| *First Name and Middle Initial(s) | *Last Name | *Suffix (eg, Jr, III) | Academic Degrees | Institution                       | Location (city, state/province, country) | Role or Contribution, eg, chair, principal investigator | Group (if more than 1 Group listed in the byline) and/or Subgroup (eg, Steering Committee) |
|-----------------------------------|------------|-----------------------|------------------|-----------------------------------|------------------------------------------|---------------------------------------------------------|--------------------------------------------------------------------------------------------|
| Mae K.                            | Isonaga    |                       | RD, MPH          | University of Hawaii              | Honolulu, HI                             | Program Coordinator                                     |                                                                                            |
| Ralph                             | Beddow     |                       | MD               | University of Hawaii              | Honolulu, HI                             |                                                         |                                                                                            |
| Nina E.                           | Bermudez   |                       | MS               | University of Hawaii              | Honolulu, HI                             |                                                         |                                                                                            |
| Lorna                             | Dias       |                       | AA               | University of Hawaii              | Honolulu, HI                             |                                                         |                                                                                            |
| Jillian                           | Inouye     |                       | RN, PhD          | University of Hawaii              | Honolulu, HI                             |                                                         |                                                                                            |
| Kathy                             | Mikami     |                       | BS, RD           | University of Hawaii              | Honolulu, HI                             |                                                         |                                                                                            |
| Pharis                            | Mohideen   |                       | MD               | University of Hawaii              | Honolulu, HI                             |                                                         |                                                                                            |
| Sharon K.                         | Odom       |                       | RD, MPH          | University of Hawaii              | Honolulu, HI                             |                                                         |                                                                                            |
| Raynette U.                       | Perry      |                       | AA               | University of Hawaii              | Honolulu, HI                             |                                                         |                                                                                            |
| Robin E.                          | Yamamoto   |                       | CDE, RD          | University of Hawaii              | Honolulu, HI                             |                                                         |                                                                                            |
| Harelda                           | Anderson   |                       | LMS              | Southwest American Indian Centers | Phoenix, AZ; Shiprock, NM; Zuni, NM      | Program Coordinator                                     |                                                                                            |
| Norman                            | Cooyate    |                       |                  | Southwest American Indian Centers | Phoenix, AZ; Shiprock, NM; Zuni, NM      | Program Coordinator                                     |                                                                                            |
| Charlotte                         | Dodge      |                       |                  | Southwest American Indian Centers | Phoenix, AZ; Shiprock, NM; Zuni, NM      | Program Coordinator                                     |                                                                                            |
| Mary A.                           | Hoskin     |                       | RD, MS           | Southwest American Indian Centers | Phoenix, AZ; Shiprock, NM; Zuni, NM      | Program Coordinator                                     |                                                                                            |
| Carol A.                          | Percy      |                       | RN, MS           | Southwest American Indian Centers | Phoenix, AZ; Shiprock, NM; Zuni, NM      | Program Coordinator                                     |                                                                                            |
| Alvera                            | Enote      |                       |                  | Southwest American Indian Centers | Phoenix, AZ; Shiprock, NM; Zuni, NM      | Program Coordinator                                     |                                                                                            |
| Camille                           | Natewa     |                       |                  | Southwest American Indian Centers | Phoenix, AZ; Shiprock, NM; Zuni, NM      | Program Coordinator                                     |                                                                                            |
| Kelly J.                          | Acton      |                       | MD, MPH          | Southwest American Indian Centers | Phoenix, AZ; Shiprock, NM; Zuni, NM      |                                                         |                                                                                            |
| Vickie L.                         | Andre      |                       | RN, FNP          | Southwest American Indian Centers | Phoenix, AZ; Shiprock, NM; Zuni, NM      |                                                         |                                                                                            |
| Rosalyn                           | Barber     |                       |                  | Southwest American Indian Centers | Phoenix, AZ; Shiprock, NM; Zuni, NM      |                                                         |                                                                                            |

## Supplemental Online Content: Nonauthor Collaborators

\*First name, last name, and suffix (if applicable) are required and will appear in PubMed.

| *First Name and Middle Initial(s) | *Last Name | *Suffix (eg, Jr, III) | Academic Degrees | Institution                       | Location (city, state/province, country) | Role or Contribution, eg, chair, principal investigator | Group (if more than 1 Group listed in the byline) and/or Subgroup (eg, Steering Committee) |
|-----------------------------------|------------|-----------------------|------------------|-----------------------------------|------------------------------------------|---------------------------------------------------------|--------------------------------------------------------------------------------------------|
| Shandiin                          | Begay      |                       | MPH              | Southwest American Indian Centers | Phoenix, AZ; Shiprock, NM; Zuni, NM      |                                                         |                                                                                            |
| Peter H.                          | Bennett    |                       | MB, FRCP         | Southwest American Indian Centers | Phoenix, AZ; Shiprock, NM; Zuni, NM      |                                                         |                                                                                            |
| Mary Beth                         | Benson     |                       | RN, BSN          | Southwest American Indian Centers | Phoenix, AZ; Shiprock, NM; Zuni, NM      |                                                         |                                                                                            |
| Evelyn C.                         | Bird       |                       | RD, MPH          | Southwest American Indian Centers | Phoenix, AZ; Shiprock, NM; Zuni, NM      |                                                         |                                                                                            |
| Brenda A.                         | Broussard  |                       | RD, MPH, N       | Southwest American Indian Centers | Phoenix, AZ; Shiprock, NM; Zuni, NM      |                                                         |                                                                                            |
| Brian C.                          | Bucca      |                       | OD, FAAO         | Southwest American Indian Centers | Phoenix, AZ; Shiprock, NM; Zuni, NM      |                                                         |                                                                                            |
| Marcella                          | Chavez     |                       | RN, AS           | Southwest American Indian Centers | Phoenix, AZ; Shiprock, NM; Zuni, NM      |                                                         |                                                                                            |
| Sherron                           | Cook       |                       |                  | Southwest American Indian Centers | Phoenix, AZ; Shiprock, NM; Zuni, NM      |                                                         |                                                                                            |
| Jeff                              | Curtis     |                       | MD               | Southwest American Indian Centers | Phoenix, AZ; Shiprock, NM; Zuni, NM      |                                                         |                                                                                            |
| Tara                              | Dacawyma   |                       |                  | Southwest American Indian Centers | Phoenix, AZ; Shiprock, NM; Zuni, NM      |                                                         |                                                                                            |
| Matthew S.                        | Doughty    |                       | MD               | Southwest American Indian Centers | Phoenix, AZ; Shiprock, NM; Zuni, NM      |                                                         |                                                                                            |
| Roberta                           | Duncan     |                       | RD               | Southwest American Indian Centers | Phoenix, AZ; Shiprock, NM; Zuni, NM      |                                                         |                                                                                            |
| Cyndy                             | Edgerton   |                       | RD               | Southwest American Indian Centers | Phoenix, AZ; Shiprock, NM; Zuni, NM      |                                                         |                                                                                            |
| Jacqueline M.                     | Ghahate    |                       |                  | Southwest American Indian Centers | Phoenix, AZ; Shiprock, NM; Zuni, NM      |                                                         |                                                                                            |
| Justin                            | Glass      |                       | MD               | Southwest American Indian Centers | Phoenix, AZ; Shiprock, NM; Zuni, NM      |                                                         |                                                                                            |

Supplemental Online Content: Nonauthor Collaborators

\*First name, last name, and suffix (if applicable) are required and will appear in PubMed.

| *First Name and Middle Initial(s) | *Last Name | *Suffix (eg, Jr, III) | Academic Degrees | Institution                       | Location (city, state/province, country) | Role or Contribution, eg, chair, principal investigator | Group (if more than 1 Group listed in the byline) and/or Subgroup (eg, Steering Committee) |
|-----------------------------------|------------|-----------------------|------------------|-----------------------------------|------------------------------------------|---------------------------------------------------------|--------------------------------------------------------------------------------------------|
| Martia                            | Glass      |                       | MD               | Southwest American Indian Centers | Phoenix, AZ; Shiprock, NM; Zuni, NM      |                                                         |                                                                                            |
| Dorothy                           | Gohdes     |                       | MD               | Southwest American Indian Centers | Phoenix, AZ; Shiprock, NM; Zuni, NM      |                                                         |                                                                                            |
| Wendy                             | Grant      |                       | MD               | Southwest American Indian Centers | Phoenix, AZ; Shiprock, NM; Zuni, NM      |                                                         |                                                                                            |
| Robert L.                         | Hanson     |                       | MD, MPH          | Southwest American Indian Centers | Phoenix, AZ; Shiprock, NM; Zuni, NM      |                                                         |                                                                                            |
| Ellie                             | Horse      |                       |                  | Southwest American Indian Centers | Phoenix, AZ; Shiprock, NM; Zuni, NM      |                                                         |                                                                                            |
| Louise E.                         | Ingraham   |                       | MS, RD, LN       | Southwest American Indian Centers | Phoenix, AZ; Shiprock, NM; Zuni, NM      |                                                         |                                                                                            |
| Merry                             | Jackson    |                       |                  | Southwest American Indian Centers | Phoenix, AZ; Shiprock, NM; Zuni, NM      |                                                         |                                                                                            |
| Priscilla                         | Jay        |                       |                  | Southwest American Indian Centers | Phoenix, AZ; Shiprock, NM; Zuni, NM      |                                                         |                                                                                            |
| Roylen S.                         | Kaskalla   |                       |                  | Southwest American Indian Centers | Phoenix, AZ; Shiprock, NM; Zuni, NM      |                                                         |                                                                                            |
| Karen                             | Kavena     |                       | ANP              | Southwest American Indian Centers | Phoenix, AZ; Shiprock, NM; Zuni, NM      |                                                         |                                                                                            |
| David                             | Kessler    |                       | MD               | Southwest American Indian Centers | Phoenix, AZ; Shiprock, NM; Zuni, NM      |                                                         |                                                                                            |
| Kathleen M.                       | Kobus      |                       | RN               | Southwest American Indian Centers | Phoenix, AZ; Shiprock, NM; Zuni, NM      |                                                         |                                                                                            |
| Jonathan                          | Krakoff    |                       | MD               | Southwest American Indian Centers | Phoenix, AZ; Shiprock, NM; Zuni, NM      |                                                         |                                                                                            |
| Jason                             | Kurland    |                       | MD               | Southwest American Indian Centers | Phoenix, AZ; Shiprock, NM; Zuni, NM      |                                                         |                                                                                            |
| Catherine                         | Manus      |                       | LPN              | Southwest American Indian Centers | Phoenix, AZ; Shiprock, NM; Zuni, NM      |                                                         |                                                                                            |

## Supplemental Online Content: Nonauthor Collaborators

\*First name, last name, and suffix (if applicable) are required and will appear in PubMed.

| *First Name and Middle Initial(s) | *Last Name | *Suffix (eg, Jr, III) | Academic Degrees | Institution                       | Location (city, state/province, country) | Role or Contribution, eg, chair, principal investigator | Group (if more than 1 Group listed in the byline) and/or Subgroup (eg, Steering Committee) |
|-----------------------------------|------------|-----------------------|------------------|-----------------------------------|------------------------------------------|---------------------------------------------------------|--------------------------------------------------------------------------------------------|
| Cherie                            | McCabe     |                       |                  | Southwest American Indian Centers | Phoenix, AZ; Shiprock, NM; Zuni, NM      |                                                         |                                                                                            |
| Sara                              | Michaels   |                       | MD               | Southwest American Indian Centers | Phoenix, AZ; Shiprock, NM; Zuni, NM      |                                                         |                                                                                            |
| Tina                              | Morgan     |                       |                  | Southwest American Indian Centers | Phoenix, AZ; Shiprock, NM; Zuni, NM      |                                                         |                                                                                            |
| Yolanda                           | Nashboo    |                       |                  | Southwest American Indian Centers | Phoenix, AZ; Shiprock, NM; Zuni, NM      |                                                         |                                                                                            |
| Julie A.                          | Nelson     |                       | RD               | Southwest American Indian Centers | Phoenix, AZ; Shiprock, NM; Zuni, NM      |                                                         |                                                                                            |
| Steven                            | Poirier    |                       | MD               | Southwest American Indian Centers | Phoenix, AZ; Shiprock, NM; Zuni, NM      |                                                         |                                                                                            |
| Evette                            | Polczynski |                       | MD               | Southwest American Indian Centers | Phoenix, AZ; Shiprock, NM; Zuni, NM      |                                                         |                                                                                            |
| Christopher                       | Piromalli  |                       | DO               | Southwest American Indian Centers | Phoenix, AZ; Shiprock, NM; Zuni, NM      |                                                         |                                                                                            |
| Mike                              | Reidy      |                       | MD               | Southwest American Indian Centers | Phoenix, AZ; Shiprock, NM; Zuni, NM      |                                                         |                                                                                            |
| Jeanine                           | Roumain    |                       | MD, MPH          | Southwest American Indian Centers | Phoenix, AZ; Shiprock, NM; Zuni, NM      |                                                         |                                                                                            |
| Debra                             | Rowse      |                       | MD               | Southwest American Indian Centers | Phoenix, AZ; Shiprock, NM; Zuni, NM      |                                                         |                                                                                            |
| Robert J.                         | Roy        |                       |                  | Southwest American Indian Centers | Phoenix, AZ; Shiprock, NM; Zuni, NM      |                                                         |                                                                                            |
| Sandra                            | Sangster   |                       | RD               | Southwest American Indian Centers | Phoenix, AZ; Shiprock, NM; Zuni, NM      |                                                         |                                                                                            |
| Janet                             | Sewenemewa |                       |                  | Southwest American Indian Centers | Phoenix, AZ; Shiprock, NM; Zuni, NM      |                                                         |                                                                                            |
| Miranda                           | Smart      |                       |                  | Southwest American Indian Centers | Phoenix, AZ; Shiprock, NM; Zuni, NM      |                                                         |                                                                                            |



## Supplemental Online Content: Nonauthor Collaborators

\*First name, last name, and suffix (if applicable) are required and will appear in PubMed.

| *First Name and Middle Initial(s) | *Last Name | *Suffix (eg, Jr, III) | Academic Degrees | Institution                                          | Location (city, state/province, country) | Role or Contribution, eg, chair, principal investigator | Group (if more than 1 Group listed in the byline) and/or Subgroup (eg, Steering Committee) |
|-----------------------------------|------------|-----------------------|------------------|------------------------------------------------------|------------------------------------------|---------------------------------------------------------|--------------------------------------------------------------------------------------------|
| Chelsea                           | Spencer    |                       |                  | Southwest American Indian Centers                    | Phoenix, AZ; Shiprock, NM; Zuni, NM      |                                                         |                                                                                            |
| Darryl                            | Tonemah    |                       | PhD              | Southwest American Indian Centers                    | Phoenix, AZ; Shiprock, NM; Zuni, NM      |                                                         |                                                                                            |
| Rachel                            | Williams   |                       | FNP              | Southwest American Indian Centers                    | Phoenix, AZ; Shiprock, NM; Zuni, NM      |                                                         |                                                                                            |
| Charlton                          | Wilson     |                       | MD               | Southwest American Indian Centers                    | Phoenix, AZ; Shiprock, NM; Zuni, NM      |                                                         |                                                                                            |
| Michelle                          | Yazzie     |                       |                  | Southwest American Indian Centers                    | Phoenix, AZ; Shiprock, NM; Zuni, NM      |                                                         |                                                                                            |
| Raymond                           | Bain       |                       | PhD              | George Washington University<br>Biostatistics Center | Rockville, MD                            | Principal Investigator                                  |                                                                                            |
| Sarah                             | Fowler     |                       | PhD              | George Washington University<br>Biostatistics Center | Rockville, MD                            | Principal Investigator                                  |                                                                                            |
| Marinella                         | Temprosa   |                       | PhD              | George Washington University<br>Biostatistics Center | Rockville, MD                            | Principal Investigator                                  |                                                                                            |
| Michael D.                        | Larsen     |                       | PhD              | George Washington University<br>Biostatistics Center | Rockville, MD                            | Principal Investigator                                  |                                                                                            |
| Tina                              | Brenneman  |                       |                  | George Washington University<br>Biostatistics Center | Rockville, MD                            | Program Coordinator                                     |                                                                                            |
| Sharon L.                         | Edelstein  |                       | ScM              | George Washington University<br>Biostatistics Center | Rockville, MD                            | Program Coordinator                                     |                                                                                            |
| Solome                            | Abebe      |                       | MS               | George Washington University<br>Biostatistics Center | Rockville, MD                            |                                                         |                                                                                            |
| Julie                             | Bamdad     |                       | MS               | George Washington University<br>Biostatistics Center | Rockville, MD                            |                                                         |                                                                                            |
| Melanie                           | Barkalow   |                       |                  | George Washington University<br>Biostatistics Center | Rockville, MD                            |                                                         |                                                                                            |
| Joel                              | Bethepu    |                       |                  | George Washington University<br>Biostatistics Center | Rockville, MD                            |                                                         |                                                                                            |

## Supplemental Online Content: Nonauthor Collaborators

\*First name, last name, and suffix (if applicable) are required and will appear in PubMed.

| *First Name and Middle Initial(s) | *Last Name       | *Suffix (eg, Jr, III) | Academic Degrees | Institution                                          | Location (city, state/province, country) | Role or Contribution, eg, chair, principal investigator | Group (if more than 1 Group listed in the byline) and/or Subgroup (eg, Steering Committee) |
|-----------------------------------|------------------|-----------------------|------------------|------------------------------------------------------|------------------------------------------|---------------------------------------------------------|--------------------------------------------------------------------------------------------|
| Tsedenia                          | Bezabeh          |                       |                  | George Washington University<br>Biostatistics Center | Rockville, MD                            |                                                         |                                                                                            |
| Anna                              | Bowers           |                       |                  | George Washington University<br>Biostatistics Center | Rockville, MD                            |                                                         |                                                                                            |
| Nicole                            | Butler           |                       |                  | George Washington University<br>Biostatistics Center | Rockville, MD                            |                                                         |                                                                                            |
| Jackie                            | Callaghan        |                       |                  | George Washington University<br>Biostatistics Center | Rockville, MD                            |                                                         |                                                                                            |
| Caitlin E.                        | Carter           |                       |                  | George Washington University<br>Biostatistics Center | Rockville, MD                            |                                                         |                                                                                            |
| Costas                            | Christophi       |                       | PhD              | George Washington University<br>Biostatistics Center | Rockville, MD                            |                                                         |                                                                                            |
| Gregory M.                        | Dwyer            |                       | MPH              | George Washington University<br>Biostatistics Center | Rockville, MD                            |                                                         |                                                                                            |
| Mary                              | Foulkes          |                       | PhD              | George Washington University<br>Biostatistics Center | Rockville, MD                            |                                                         |                                                                                            |
| Yuping                            | Gao              |                       |                  | George Washington University<br>Biostatistics Center | Rockville, MD                            |                                                         |                                                                                            |
| Robert                            | Gooding          |                       |                  | George Washington University<br>Biostatistics Center | Rockville, MD                            |                                                         |                                                                                            |
| Adrienne                          | Gottlieb         |                       |                  | George Washington University<br>Biostatistics Center | Rockville, MD                            |                                                         |                                                                                            |
| Kristina L.                       | Grimes           |                       |                  | George Washington University<br>Biostatistics Center | Rockville, MD                            |                                                         |                                                                                            |
| Nisha                             | Grover-Fairchild |                       | MPH              | George Washington University<br>Biostatistics Center | Rockville, MD                            |                                                         |                                                                                            |
| Lori                              | Haffner          |                       | MS               | George Washington University<br>Biostatistics Center | Rockville, MD                            |                                                         |                                                                                            |
| Heather                           | Hoffman          |                       | PhD              | George Washington University<br>Biostatistics Center | Rockville, MD                            |                                                         |                                                                                            |

## Supplemental Online Content: Nonauthor Collaborators

\*First name, last name, and suffix (if applicable) are required and will appear in PubMed.

| *First Name and Middle Initial(s) | *Last Name   | *Suffix (eg, Jr, III) | Academic Degrees | Institution                                          | Location (city, state/province, country) | Role or Contribution, eg, chair, principal investigator | Group (if more than 1 Group listed in the byline) and/or Subgroup (eg, Steering Committee) |
|-----------------------------------|--------------|-----------------------|------------------|------------------------------------------------------|------------------------------------------|---------------------------------------------------------|--------------------------------------------------------------------------------------------|
| Kathleen                          | Jablonski    |                       | PhD              | George Washington University<br>Biostatistics Center | Rockville, MD                            |                                                         |                                                                                            |
| Steve                             | Jones        |                       |                  | George Washington University<br>Biostatistics Center | Rockville, MD                            |                                                         |                                                                                            |
| Tara L.                           | Jones        |                       |                  | George Washington University<br>Biostatistics Center | Rockville, MD                            |                                                         |                                                                                            |
| Richard                           | Katz         |                       | MD               | George Washington University<br>Biostatistics Center | Rockville, MD                            |                                                         |                                                                                            |
| Preethy                           | Kolinjivadi  |                       | MS               | George Washington University<br>Biostatistics Center | Rockville, MD                            |                                                         |                                                                                            |
| John M.                           | Lachin       |                       | ScD              | George Washington University<br>Biostatistics Center | Rockville, MD                            |                                                         |                                                                                            |
| Yong                              | Ma           |                       | PhD              | George Washington University<br>Biostatistics Center | Rockville, MD                            |                                                         |                                                                                            |
| Pamela                            | Mucik        |                       |                  | George Washington University<br>Biostatistics Center | Rockville, MD                            |                                                         |                                                                                            |
| Robert                            | Orlosky      |                       |                  | George Washington University<br>Biostatistics Center | Rockville, MD                            |                                                         |                                                                                            |
| Susan                             | Reamer       |                       |                  | George Washington University<br>Biostatistics Center | Rockville, MD                            |                                                         |                                                                                            |
| James                             | Rochon       |                       | PhD              | George Washington University<br>Biostatistics Center | Rockville, MD                            |                                                         |                                                                                            |
| Alla                              | Sapozhnikova |                       |                  | George Washington University<br>Biostatistics Center | Rockville, MD                            |                                                         |                                                                                            |
| Hanna                             | Sherif       |                       | MS               | George Washington University<br>Biostatistics Center | Rockville, MD                            |                                                         |                                                                                            |
| Charlotte                         | Stimpson     |                       |                  | George Washington University<br>Biostatistics Center | Rockville, MD                            |                                                         |                                                                                            |
| Ashley                            | Hogan Tjaden |                       | MPH              | George Washington University<br>Biostatistics Center | Rockville, MD                            |                                                         |                                                                                            |

## Supplemental Online Content: Nonauthor Collaborators

\*First name, last name, and suffix (if applicable) are required and will appear in PubMed.

| *First Name and Middle Initial(s) | *Last Name    | *Suffix (eg, Jr, III) | Academic Degrees | Institution                                          | Location (city, state/province, country) | Role or Contribution, eg, chair, principal investigator | Group (if more than 1 Group listed in the byline) and/or Subgroup (eg, Steering Committee) |
|-----------------------------------|---------------|-----------------------|------------------|------------------------------------------------------|------------------------------------------|---------------------------------------------------------|--------------------------------------------------------------------------------------------|
| Fredricka                         | Walker-Murray |                       |                  | George Washington University<br>Biostatistics Center | Rockville, MD                            |                                                         |                                                                                            |
| Elizabeth M.                      | Venditti      |                       | PhD              | Lifestyle Resource Core                              |                                          | Principal Investigator                                  |                                                                                            |
| Andrea M.                         | Kriska        |                       | PhD              | Lifestyle Resource Core                              |                                          |                                                         |                                                                                            |
| Linda                             | Semler        |                       | MS, RD, LD       | Lifestyle Resource Core                              |                                          |                                                         |                                                                                            |
| Valerie                           | Weinzierl     |                       | MPH              | Lifestyle Resource Core                              |                                          |                                                         |                                                                                            |
| Santica                           | Marcovina     |                       | PhD, ScD         | Central Biochemistry Laboratory                      | Seattle, WA                              | Principal Investigator                                  |                                                                                            |
| F. Alan                           | Aldrich       |                       |                  | Central Biochemistry Laboratory                      | Seattle, WA                              | Program Coordinator                                     |                                                                                            |
| Jessica                           | Harting       |                       |                  | Central Biochemistry Laboratory                      | Seattle, WA                              | Program Coordinator                                     |                                                                                            |
| John                              | Albers        |                       | PhD              | Central Biochemistry Laboratory                      | Seattle, WA                              |                                                         |                                                                                            |
| Greg                              | Strylewicz    |                       | PhD              | Central Biochemistry Laboratory                      | Seattle, WA                              |                                                         |                                                                                            |
| R.                                | Eastman       |                       | MD               | NIH/NIDDK                                            | Bethesda, MD                             |                                                         |                                                                                            |
| Judith                            | Fradkin       |                       | MD               | NIH/NIDDK                                            | Bethesda, MD                             |                                                         |                                                                                            |
| Sanford                           | Garfield      |                       | PhD              | NIH/NIDDK                                            | Bethesda, MD                             |                                                         |                                                                                            |
| Christine                         | Lee           |                       | MD, MS           | NIH/NIDDK                                            | Bethesda, MD                             |                                                         |                                                                                            |
| Edward                            | Gregg         |                       | PhD              | Centers for Disease Control &<br>Prevention          | Atlanta, GA                              |                                                         |                                                                                            |
| Ping                              | Zhang         |                       | PhD              | Centers for Disease Control &<br>Prevention          | Atlanta, GA                              |                                                         |                                                                                            |
|                                   |               |                       |                  |                                                      |                                          |                                                         |                                                                                            |
| Dan                               | O'Leary       |                       | MD               | Carotid Ultrasound                                   |                                          | Principal Investigator                                  |                                                                                            |
| Gregory                           | Evans         |                       |                  | Carotid Ultrasound                                   |                                          |                                                         |                                                                                            |
|                                   |               |                       |                  |                                                      |                                          |                                                         |                                                                                            |
| Matthew                           | Budoff        |                       | MD               | Coronary Artery Calcification<br>Reading Center      |                                          |                                                         |                                                                                            |
| Chris                             | Dailing       |                       |                  | Coronary Artery Calcification<br>Reading Center      |                                          |                                                         |                                                                                            |
|                                   |               |                       |                  |                                                      |                                          |                                                         |                                                                                            |
| Elizabeth                         | Stamm         |                       | MD               | CT Scan Reading Center                               |                                          | Principal Investigator                                  |                                                                                            |

## Supplemental Online Content: Nonauthor Collaborators

\*First name, last name, and suffix (if applicable) are required and will appear in PubMed.

| *First Name and Middle Initial(s) | *Last Name | *Suffix (eg, Jr, III) | Academic Degrees | Institution                                          | Location (city, state/province, country) | Role or Contribution, eg, chair, principal investigator | Group (if more than 1 Group listed in the byline) and/or Subgroup (eg, Steering Committee) |
|-----------------------------------|------------|-----------------------|------------------|------------------------------------------------------|------------------------------------------|---------------------------------------------------------|--------------------------------------------------------------------------------------------|
| Ann                               | Schwartz   |                       | PhD              | Dual Energy X-ray Absorptiometry Reading Center      | San Francisco, CA                        |                                                         |                                                                                            |
| Caroline                          | Navy       |                       |                  | Dual Energy X-ray Absorptiometry Reading Center      | San Francisco, CA                        |                                                         |                                                                                            |
| Lisa                              | Palermo    |                       | MS               | Dual Energy X-ray Absorptiometry Reading Center      | San Francisco, CA                        |                                                         |                                                                                            |
| Pentti                            | Rautaharju |                       | MD, PhD          | Epidemiological Cardiology Research Center - Epicare | Winston-Salem, NC                        | Principal Investigator                                  |                                                                                            |
| Ronald J.                         | Prineas    |                       | MD, PhD          | Epidemiological Cardiology Research Center - Epicare | Winston-Salem, NC                        | Program Coordinator                                     |                                                                                            |
| Teresa                            | Alexander  |                       |                  | Epidemiological Cardiology Research Center - Epicare | Winston-Salem, NC                        |                                                         |                                                                                            |
| Charles                           | Campbell   |                       | MS               | Epidemiological Cardiology Research Center - Epicare | Winston-Salem, NC                        |                                                         |                                                                                            |
| Sharon                            | Hall       |                       |                  | Epidemiological Cardiology Research Center - Epicare | Winston-Salem, NC                        |                                                         |                                                                                            |
| Yabing                            | Li         |                       | MD               | Epidemiological Cardiology Research Center - Epicare | Winston-Salem, NC                        |                                                         |                                                                                            |
| Margaret                          | Mills      |                       |                  | Epidemiological Cardiology Research Center - Epicare | Winston-Salem, NC                        |                                                         |                                                                                            |
| Nancy                             | Pemberton  |                       | MS               | Epidemiological Cardiology Research Center - Epicare | Winston-Salem, NC                        |                                                         |                                                                                            |
| Farida                            | Rautaharju |                       | PhD              | Epidemiological Cardiology Research Center - Epicare | Winston-Salem, NC                        |                                                         |                                                                                            |
| Zhuming                           | Zhang      |                       | MD               | Epidemiological Cardiology Research Center - Epicare | Winston-Salem, NC                        |                                                         |                                                                                            |
| Elsayed Z.                        | Soliman    |                       | MD               | Epidemiological Cardiology Research Center - Epicare | Winston-Salem, NC                        | Principal Investigator                                  |                                                                                            |

## Supplemental Online Content: Nonauthor Collaborators

\*First name, last name, and suffix (if applicable) are required and will appear in PubMed.

| *First Name and Middle Initial(s) | *Last Name | *Suffix (eg, Jr, III) | Academic Degrees | Institution                                          | Location (city, state/province, country) | Role or Contribution, eg, chair, principal investigator | Group (if more than 1 Group listed in the byline) and/or Subgroup (eg, Steering Committee) |
|-----------------------------------|------------|-----------------------|------------------|------------------------------------------------------|------------------------------------------|---------------------------------------------------------|--------------------------------------------------------------------------------------------|
| Julie                             | Hu         |                       | MS               | Epidemiological Cardiology Research Center - Epicare | Winston-Salem, NC                        |                                                         |                                                                                            |
| Susan                             | Hensley    |                       | BS               | Epidemiological Cardiology Research Center - Epicare | Winston-Salem, NC                        |                                                         |                                                                                            |
| Lisa                              | Keasler    |                       |                  | Epidemiological Cardiology Research Center - Epicare | Winston-Salem, NC                        |                                                         |                                                                                            |
| Tonya                             | Taylor     |                       |                  | Epidemiological Cardiology Research Center - Epicare | Winston-Salem, NC                        |                                                         |                                                                                            |
| Barbara                           | Blodi      |                       | MD               | Fundus Photo Reading Center                          | Madison, WI                              | Principal Investigator                                  |                                                                                            |
| Ronald                            | Danis      |                       | MD               | Fundus Photo Reading Center                          | Madison, WI                              | Principal Investigator                                  |                                                                                            |
| Matthew                           | Davis      |                       | MD               | Fundus Photo Reading Center                          | Madison, WI                              | Principal Investigator                                  |                                                                                            |
| Larry                             | Hubbard*   |                       |                  | Fundus Photo Reading Center                          | Madison, WI                              | Principal Investigator                                  |                                                                                            |
| Ryan                              | Endres**   |                       |                  | Fundus Photo Reading Center                          | Madison, WI                              | Program Coordinator                                     |                                                                                            |
| Deborah                           | Elsas**    |                       |                  | Fundus Photo Reading Center                          | Madison, WI                              | Program Coordinator                                     |                                                                                            |
| Samantha                          | Johnson**  |                       |                  | Fundus Photo Reading Center                          | Madison, WI                              | Program Coordinator                                     |                                                                                            |
| Dawn                              | Myers**    |                       |                  | Fundus Photo Reading Center                          | Madison, WI                              | Program Coordinator                                     |                                                                                            |
| Nancy                             | Barrett    |                       |                  | Fundus Photo Reading Center                          | Madison, WI                              |                                                         |                                                                                            |
| Heather                           | Baumhauer  |                       |                  | Fundus Photo Reading Center                          | Madison, WI                              |                                                         |                                                                                            |
| Wendy                             | Benz       |                       |                  | Fundus Photo Reading Center                          | Madison, WI                              |                                                         |                                                                                            |
| Holly                             | Cohn       |                       |                  | Fundus Photo Reading Center                          | Madison, WI                              |                                                         |                                                                                            |
| Ellie                             | Corkery    |                       |                  | Fundus Photo Reading Center                          | Madison, WI                              |                                                         |                                                                                            |
| Kristi                            | Dohm       |                       |                  | Fundus Photo Reading Center                          | Madison, WI                              |                                                         |                                                                                            |
| Vonnie                            | Gama       |                       |                  | Fundus Photo Reading Center                          | Madison, WI                              |                                                         |                                                                                            |
| Anne                              | Goulding   |                       |                  | Fundus Photo Reading Center                          | Madison, WI                              |                                                         |                                                                                            |
| Andy                              | Ewen       |                       |                  | Fundus Photo Reading Center                          | Madison, WI                              |                                                         |                                                                                            |
| Cynthia                           | Hurtenbach |                       |                  | Fundus Photo Reading Center                          | Madison, WI                              |                                                         |                                                                                            |
| Daniel                            | Lawrence   |                       |                  | Fundus Photo Reading Center                          | Madison, WI                              |                                                         |                                                                                            |

## Supplemental Online Content: Nonauthor Collaborators

\*First name, last name, and suffix (if applicable) are required and will appear in PubMed.

| *First Name and Middle Initial(s) | *Last Name  | *Suffix (eg, Jr, III) | Academic Degrees | Institution                     | Location (city, state/province, country) | Role or Contribution, eg, chair, principal investigator | Group (if more than 1 Group listed in the byline) and/or Subgroup (eg, Steering Committee) |
|-----------------------------------|-------------|-----------------------|------------------|---------------------------------|------------------------------------------|---------------------------------------------------------|--------------------------------------------------------------------------------------------|
| Kyle                              | McDaniel    |                       |                  | Fundus Photo Reading Center     | Madison, WI                              |                                                         |                                                                                            |
| Jeong                             | Pak         |                       |                  | Fundus Photo Reading Center     | Madison, WI                              |                                                         |                                                                                            |
| James                             | Reimers     |                       |                  | Fundus Photo Reading Center     | Madison, WI                              |                                                         |                                                                                            |
| Ruth                              | Shaw        |                       |                  | Fundus Photo Reading Center     | Madison, WI                              |                                                         |                                                                                            |
| Maria                             | Swift       |                       |                  | Fundus Photo Reading Center     | Madison, WI                              |                                                         |                                                                                            |
| Pamela                            | Vargo       |                       | CRA              | Fundus Photo Reading Center     | Madison, WI                              |                                                         |                                                                                            |
| Sheila                            | Watson      |                       |                  | Fundus Photo Reading Center     | Madison, WI                              |                                                         |                                                                                            |
| Jennifer                          | Manly       |                       | PhD              | Neurocognitive Assessment Group |                                          |                                                         |                                                                                            |
| Elizabeth                         | Mayer-Davis |                       | PhD              | Nutrition Coding Center         | Columbia, SC                             | Principal Investigator                                  |                                                                                            |
| Robert R.                         | Moran       |                       | PhD              | Nutrition Coding Center         | Columbia, SC                             | Program Coordinator                                     |                                                                                            |
| Ted                               | Ganiats     |                       | MD               | Quality of Well-Being Center    | La Jolla, CA                             | Principal Investigator                                  |                                                                                            |
| Kristin                           | David       |                       | MHP              | Quality of Well-Being Center    | La Jolla, CA                             | Principal Investigator                                  |                                                                                            |
| Andrew J.                         | Sarkin      |                       | PhD              | Quality of Well-Being Center    | La Jolla, CA                             | Principal Investigator                                  |                                                                                            |
| Erik                              | Groessl     |                       | PhD              | Quality of Well-Being Center    | La Jolla, CA                             |                                                         |                                                                                            |
| Naomi                             | Katzir      |                       |                  | Quality of Well-Being Center    | La Jolla, CA                             |                                                         |                                                                                            |
| Helen                             | Chong       |                       | MA               | Quality of Well-Being Center    | La Jolla, CA                             |                                                         |                                                                                            |
| William H.                        | Herman      |                       | MD, MPH          | University of Michigan          | Ann Arbor, MI                            |                                                         |                                                                                            |
| Michael                           | Brändle     |                       | MD, MS           | University of Michigan          | Ann Arbor, MI                            |                                                         |                                                                                            |
| Morton B.                         | Brown       |                       | PhD              | University of Michigan          | Ann Arbor, MI                            |                                                         |                                                                                            |
| Jose C.                           | Florez      |                       | MD, PhD          | Massachusetts General Hospital  | Boston, MA                               | Genetics Working Group                                  |                                                                                            |
| David                             | Altshuler   |                       | MD, PhD          | Massachusetts General Hospital  | Boston, MA                               | Genetics Working Group                                  |                                                                                            |
| Liana K.                          | Billings    |                       | MD               | Massachusetts General Hospital  | Boston, MA                               | Genetics Working Group                                  |                                                                                            |
| Ling                              | Chen        |                       | MS               | Massachusetts General Hospital  |                                          | Genetics Working Group                                  |                                                                                            |
| Maegan                            | Harden      |                       | BS               | Broad Institute                 |                                          | Genetics Working Group                                  |                                                                                            |

## Supplemental Online Content: Nonauthor Collaborators

\*First name, last name, and suffix (if applicable) are required and will appear in PubMed.

| *First Name and Middle Initial(s) | *Last Name | *Suffix (eg, Jr, III) | Academic Degrees | Institution                                          | Location (city, state/province, country) | Role or Contribution, eg, chair, principal investigator | Group (if more than 1 Group listed in the byline) and/or Subgroup (eg, Steering Committee) |
|-----------------------------------|------------|-----------------------|------------------|------------------------------------------------------|------------------------------------------|---------------------------------------------------------|--------------------------------------------------------------------------------------------|
| Robert L.                         | Hanson     |                       | MD, MPH          | NIDDK                                                | Bethesda, MD                             | Genetics Working Group                                  |                                                                                            |
| William C.                        | Knowler    |                       | MD, DrPH         | NIDDK                                                | Bethesda, MD                             | Genetics Working Group                                  |                                                                                            |
| Toni I.                           | Pollin     |                       | PhD              | University of Maryland                               | College Park, MD                         | Genetics Working Group                                  |                                                                                            |
| Alan R.                           | Shuldiner  |                       | MD               | University of Maryland                               | College Park, MD                         | Genetics Working Group                                  |                                                                                            |
| Kathleen                          | Jablonski  |                       | PhD              | George Washington University<br>Biostatistics Center | Rockville, MD                            | Genetics Working Group                                  |                                                                                            |
| Paul W.                           | Franks     |                       | PhD, MPhil       | Harvard School of Public Health                      |                                          | Genetics Working Group                                  |                                                                                            |
| Marie-France                      | Hivert     |                       | MD               | Harvard School of Public Health                      |                                          | Genetics Working Group                                  |                                                                                            |
